1 **Longitudinal evidence for a mutually reinforcing**  
2 **relationship between white matter hyperintensities and**  
3 **cortical thickness in cognitively unimpaired older**  
4 **adults**

5 Jose Bernal<sup>1,2,3,4</sup>, Inga Menze<sup>1,2</sup>, Renat Yakupov<sup>1,2</sup>, Oliver Peters<sup>5,6</sup>, Julian  
6 Hellmann-Regen<sup>5,7,8</sup>, Silka Dawn Freiesleben<sup>5,6</sup>, Josef Priller<sup>4,5,9,10</sup>, Eike Jakob  
7 Spruth<sup>5,9</sup>, Slawek Altenstein<sup>5,9</sup>, Anja Schneider<sup>11,12</sup>, Klaus Fliessbach<sup>11,12</sup>, Jens  
8 Wiltfang<sup>13,14,15</sup>, Björn H.Schott<sup>13,14,16</sup>, Frank Jessen<sup>11,17,18</sup>, Ayda Rostamzadeh<sup>17</sup>,  
9 Wenzel Glanz<sup>2</sup>, Enise I. Incesoy<sup>1,2,19</sup>, Katharina Buerger<sup>20,21</sup>, Daniel Janowitz<sup>21</sup>,  
10 Michael Ewers<sup>20,21</sup>, Robert Perneczky<sup>20,22,23,24</sup>, Boris-Stephan Rauchmann<sup>22,25,26</sup>,  
11 Stefan Teipel<sup>27,28</sup>, Ingo Kilimann<sup>27,28</sup>, Christoph Laske<sup>29,30</sup>, Sebastian  
12 Sodenkamp<sup>29,31</sup>, Annika Spottke<sup>11,32</sup>, Anna Esser<sup>11</sup>, Falk Lüsebrink<sup>2</sup>, Peter  
13 Dechent<sup>33</sup>, Stefan Hetzer<sup>34</sup>, Klaus Scheffler<sup>35</sup>, Stefanie Schreiber<sup>2,36</sup>, Emrah  
14 Düzel<sup>1,2,T</sup>, Gabriel Ziegler<sup>1,2,T</sup>

15 **Author affiliations:**

16 <sup>1</sup>Institute of Cognitive Neurology and Dementia Research, Otto-von-Guericke University Magdeburg, Magdeburg,  
17 Germany

18 <sup>2</sup>German Centre for Neurodegenerative Diseases (DZNE), Magdeburg, Germany

19 <sup>3</sup>Centre for Clinical Brain Sciences, the University of Edinburgh, Edinburgh, UK

20 <sup>4</sup>UK Dementia Research Institute Centre at the University of Edinburgh, Edinburgh, UK

21 <sup>5</sup>German Centre for Neurodegenerative Diseases (DZNE), Berlin, Germany

22 <sup>6</sup>Charité – Universitätsmedizin Berlin, Institute of Psychiatry and Psychotherapy, Berlin, Germany

23 <sup>7</sup>Charité – Universitätsmedizin Berlin, Department of Psychiatry and Neurosciences, Campus Benjamin Franklin,  
24 Berlin, Germany

25 <sup>8</sup>German Centre for Mental Health (DZPG), Berlin, Germany

26 <sup>9</sup>Department of Psychiatry and Psychotherapy, Charité, Berlin, Germany

27 <sup>10</sup>School of Medicine, Department of Psychiatry and Psychotherapy, Technical University of Munich, Munich,  
28 Germany

29 <sup>11</sup>German Centre for Neurodegenerative Diseases (DZNE), Bonn, Germany

30 <sup>12</sup>Department of Old Age Psychiatry and Cognitive Disorders, University Hospital Bonn and University of Bonn,  
31 Bonn, Germany

32 <sup>13</sup>German Centre for Neurodegenerative Diseases (DZNE), Göttingen, Germany

33 <sup>14</sup>Department of Psychiatry and Psychotherapy, University Medical Centre Göttingen, University of Göttingen,  
34 Göttingen, Germany

35 <sup>15</sup>Neurosciences and Signalling Group, Institute of Biomedicine (iBiMED), Department of Medical Sciences,  
36 University of Aveiro, Aveiro, Portugal

37 <sup>16</sup>Leibniz Institute for Neurobiology, Brenneckestr. 6, 39118, Magdeburg, Germany.  
38 <sup>17</sup>Department of Psychiatry, University of Cologne, Medical Faculty, Cologne, Germany  
39 <sup>18</sup>Excellence Cluster on Cellular Stress Responses in Aging-Associated Diseases (CECAD), University of  
40 Cologne, Cologne, Germany  
41 <sup>19</sup>Department for Psychiatry and Psychotherapy, University Clinic Magdeburg, Magdeburg, Germany  
42 <sup>20</sup>German Centre for Neurodegenerative Diseases (DZNE), Munich, Germany  
43 <sup>21</sup>Institute for Stroke and Dementia Research (ISD), University Hospital, LMU Munich, Munich, Germany  
44 <sup>22</sup>Department of Psychiatry and Psychotherapy, University Hospital, LMU Munich, Munich, Germany  
45 <sup>23</sup>Munich Cluster for Systems Neurology (SyNergy) Munich, Munich, Germany  
46 <sup>24</sup>Ageing Epidemiology Research Unit (AGE), School of Public Health, Imperial College London, London, UK  
47 <sup>25</sup>Sheffield Institute for Translational Neuroscience (SITraN), University of Sheffield, Sheffield, UK  
48 <sup>26</sup>Department of Neuroradiology, University Hospital LMU, Munich, Germany  
49 <sup>27</sup>German Centre for Neurodegenerative Diseases (DZNE), Rostock, Germany  
50 <sup>28</sup>Department of Psychosomatic Medicine, Rostock University Medical Centre, Rostock, Germany  
51 <sup>29</sup>German Centre for Neurodegenerative Diseases (DZNE), Tübingen, Germany  
52 <sup>30</sup>Section for Dementia Research, Hertie Institute for Clinical Brain Research and Department of Psychiatry and  
53 Psychotherapy, University of Tübingen, Tübingen, Germany  
54 <sup>31</sup>Department of Psychiatry and Psychotherapy, University of Tübingen, Tübingen, Germany  
55 <sup>32</sup>Department of Neurology, University of Bonn, Bonn, Germany  
56 <sup>33</sup>MR-Research in Neurosciences, Department of Cognitive Neurology, Georg-August-University Göttingen,  
57 Germany  
58 <sup>34</sup>Berlin Centre for Advanced Neuroimaging, Charité – Universitätsmedizin Berlin, Berlin, Germany  
59 <sup>35</sup>Department for Biomedical Magnetic Resonance, University of Tübingen, Tübingen, Germany  
60 <sup>36</sup>Department of Neurology, University Hospital Magdeburg, Magdeburg, Germany  
61 <sup>†</sup>Shared last authorship  
62  
63

64 Correspondence to: Jose Bernal

65 Full address: German Centre for Neurodegenerative Diseases (DZNE), Magdeburg,  
66 Leipziger Str. 44, 39120 Magdeburg, Germany

67 E-Mail: [jose.bernalmoiano@dzne.de](mailto:jose.bernalmoiano@dzne.de)

68

## 69 **Abbreviations**

70 AD: Alzheimer's Disease

71 BLGCM: Bivariate Latent Growth Curve Model

72 CERAD: Consortium to Establish a Registry for AD

73 CFI: Comparative Fit Index

74 CI: Confidence Interval

75 CSF: Cerebrospinal Fluid

76 CSVD: Cerebral Small Vessel Disease

77 DELCODE: DZNE Longitudinal Cognitive Impairment and Dementia Study

78 DZNE: German Centre for Neurodegenerative Diseases

79 FDR: False Discovery Rate

80 HCP: Human Connectome Project

81 LGCM: Latent Growth Curve Model

82 MRI: Magnetic Resonance Imaging

83 MS: Multiple Sclerosis

84 RMSEA: Root Mean Square Error of Approximation

85 SE: Standard Error

86 SEM: Structural Equation Model

87 SRMR: Standardised Root Mean Residual

88 TICV: Total Intracranial Volume

89 WMH: White Matter Hyperintensities

90

## 91 **Abstract**

### 92 **Background**

93 For over three decades, the concomitance of cortical neurodegeneration and white  
94 matter hyperintensities (WMH) has sparked discussions about their coupled  
95 temporal dynamics. Longitudinal studies supporting this hypothesis remain  
96 nonetheless scarce.

### 97 **Methods**

98 In this study, we applied regional and global bivariate latent growth curve modelling  
99 (BLGCM) to longitudinal data from 436 cognitively unimpaired participants  
100 (DELCODE cohort; median age 69.70 [IQR 65.44, 74.49] years; 52.98% female) to  
101 examine the extent to which WMH and cortical thickness were interrelated over a  
102 four-year period.

### 103 **Results**

104 Our findings were three-fold. First, at baseline, individuals with larger WMH volumes  
105 had lower mean cortical thicknesses over the entire brain. Second, individuals who  
106 experienced a steeper thinning of their cingulate and temporal cortices over time had  
107 larger baseline WMH volumes in the frontal, parietal, and occipital lobes. Third,  
108 individuals with thinner cortices at baseline tended to undergo faster WMH  
109 progression over four years, particularly in the occipital and parietal lobes.

## 110 **Conclusions**

111 Our study suggests that cortical thinning and WMH progression could be mutually  
112 reinforcing rather than parallel, unrelated processes, which become entangled before  
113 cognitive deficits are detectable.

## 114 **Trial Registration**

115 German Clinical Trials Register (DRKS00007966, 04/05/2015)

116

117 **Keywords:** White Matter Hyperintensities; Cortical Thickness; Latent Growth Curve  
118 Model; Longitudinal Modelling; Structural Magnetic Resonance Imaging

119

## 120 **Introduction**

121 Cortical thinning and white matter hyperintensities (WMH) progression are well-  
122 known ageing processes that take place throughout middle and late adulthood [1–9].  
123 Both processes appear to be influenced by genetic and lifestyle factors [2,10–15] as  
124 well as by the onset and progression of neurodegenerative and cerebrovascular  
125 diseases [1,2,9,16–20]. Although overlapping risk factors may offer an initial  
126 explanation for their concomitance [3,6,11,21,22], their persistent association after

127 controlling for demographics and traditional cardiovascular risk factors [3,6,10,23–  
128 25] has sparked more than three decades of research into coupled temporal  
129 dynamics [3,26].

130 Coupled temporal dynamics between WMH and cortical atrophy are currently  
131 discussed from two non-exclusive perspectives: the cerebrovascular and the  
132 neurodegenerative hypotheses [17,26]. The cerebrovascular hypothesis posits that  
133 ischaemic and hypoxic damages—operationalised as WMH [15,27–29]—may initially  
134 result in the depletion of oxygen, nutrients, and trophic support in perilesional regions  
135 [16,28]. Subsequently, these damages may also disrupt the function and metabolic  
136 demands of compromised white matter tracts and associated cortical regions,  
137 leading to cortical atrophy [6,9,17,27,30]. On the other hand, the neurodegenerative  
138 hypothesis proposes that cortical neurodegeneration could contribute to WMH  
139 formation [17,26,29,31–34], especially in conjunction with tau pathologies [26,29,34].  
140 Excessive tau phosphorylation could promote microtubule destabilisation, thereby  
141 causing axonal transport dysfunction, energy depletion, and calcium imbalance—a  
142 hallmark of Wallerian degeneration [34]. In the light of the posterior dominance of  
143 WMH in Alzheimer’s disease (AD) [26,35–38], both hypotheses would require effects  
144 of cortical neurodegeneration and WMH to be particularly pronounced in parietal and  
145 occipital brain regions. Longitudinal evidence and multivariate modelling  
146 substantiating these hypotheses remain nonetheless scarce, especially in cognitively  
147 unimpaired older adults [1].

148 In this study, we leveraged bivariate latent growth curve modelling (BLGCM) to  
149 examine the bidirectional relationship between lobar WMH and regional cortical  
150 thickness over four years in older individuals without objective cognitive impairment.

## 151 **Methods**

### 152 **Study participants**

153 We used baseline and annual follow-up data for up to 48 months from participants of  
154 the observational longitudinal multicentre DELCODE (DZNE Longitudinal Cognitive  
155 Impairment and Dementia) Study [39]—a memory-clinic-based observational  
156 multicentre study from the German Centre for Neurodegenerative Diseases (DZNE)  
157 that uses multimodal assessment of preclinical, prodromal, and clinical stages of AD,  
158 with a particular focus on subjective cognitive decline. In the present work, we  
159 focused on cognitively unimpaired participants who underwent at least three MRI  
160 scanning sessions and whose follow-up MRI sessions took place within four months  
161 prior or after their yearly comprehensive examination.

162 At baseline, participants underwent a thorough evaluation at their local study site,  
163 which included medical history checks, a psychiatric and neurological examination,  
164 neuropsychological testing, blood and cerebrospinal fluid (CSF) collection, and MRI  
165 in accordance with local standards. All DELCODE sites used the Consortium to  
166 Establish a Registry for AD (CERAD-plus) neuropsychological test battery to assess  
167 cognitive function. To be classified as cognitively unimpaired, participants were  
168 defined by performing within at least required to performed better than -1.5 standard  
169 deviations of the age-, sex-, and education-adjusted normal performance on all  
170 subtests of the test battery [39].

171 Additional inclusion criteria were age  $\geq$  60 years, fluent German language skills,  
172 capacity to provide informed consent, and the the availability of a study partner. The  
173 main exclusion criteria for all groups were conditions clearly interfering with

174 participation in the study or the study procedures, including significant sensory  
175 impairment. The following medical conditions were considered exclusion criteria:  
176 current or history of major depressive episode and major psychiatric disorders either  
177 at baseline (e.g., psychotic disorder, bipolar disorder, substance abuse),  
178 neurodegenerative diseases other than AD, vascular dementia, history of stroke with  
179 residual clinical symptoms, history of disseminated malignant disease, severe or  
180 unstable medical conditions, and clinically significant vitamin B12 deficiency at  
181 baseline. Prohibited drugs included chronic use of psychoactive compounds with  
182 sedative or anticholinergic effects, use of anti-dementia agents, and investigational  
183 drugs for the treatment of dementia or cognitive impairment one month before study  
184 entry and throughout the duration of the study.

185 All participants provided their written informed consent in accordance with the  
186 Declaration of Helsinki at baseline. DELCODE has been registered within the  
187 German Clinical Trials Register (DRKS00007966, 04/05/2015). Ethics committees of  
188 the medical faculties of all participating sites (i.e., Berlin (Charité -  
189 Universitätsmedizin Berlin), Bonn, Cologne, Göttingen, Magdeburg, Munich (Ludwig-  
190 Maximilians-University), Rostock, and Tübingen) approved the DELCODE study  
191 protocol before inclusion of the first participants. The ethics committee of the medical  
192 faculty of the University of Bonn led and coordinated the process.

## 193 **Total cardiovascular risk score**

194 We established a total cardiovascular risk score for each participant by tallying their  
195 dichotomised (y/n) history of smoking, presence of obesity, hyperlipidemia, arterial  
196 hypertension, and diabetes, as reported in their medical records. We corrected the  
197 sum of present risk factors by the amount of available information. For example, if an  
198 individual had a history of arterial hypertension and diabetes but we did not have  
199 data on smoking, obesity, or hyperlipidemia, the final score would be 1.00. The  
200 corrected total cardiovascular risk scores ranged from 0.0 to 1.0, where the lowest  
201 and highest values denoted the absence or presence of all available risk factors,  
202 respectively.

## 203 **MRI**

204 MRI acquisition took place at nine DZNE sites or associated university medical  
205 centers equipped with 3T Siemens MR scanners. In the present study, we leveraged  
206 the following structural sequences: T1w MPRAGE (full head coverage, 3D  
207 acquisition, GRAPPA factor 2, 1 mm<sup>3</sup> isotropic, 256 × 256 px, 192 sagittal slices,  
208 TR/TE/TI 2500/4.33/1100 ms, FA 7°) and T2w FLAIR (full head coverage, 3D  
209 acquisition, 1 mm<sup>3</sup> isotropic, 256 × 256 px, 192 sagittal slices, TR/TE/TI  
210 5000/394/1800 ms). The DZNE imaging network oversaw operating procedures, as  
211 well as quality assurance and assessment (iNET, Magdeburg) [39].



## 212 **MRI-based measurements**

### 213 **Cortical thickness**

214 We used the CAT12 longitudinal pipeline [40] ([neuro-jena.github.io](https://neuro-jena.github.io)) to reconstruct  
215 cortical thickness surfaces for each subject and for each time point (ageing workflow;  
216 default parameters, except for final resolution, which we set to 1 mm<sup>3</sup>). We  
217 smoothed all surfaces with a 12-mm Gaussian filter and resampled them to the 32k  
218 HCP surface template. We also used CAT12 to estimate mean thickness throughout  
219 the whole brain cortex and within cortical regions as per the Desikan-Killiany cortical  
220 parcellation atlas [41].

### 221 **WMH segmentation**

222 We manually segmented WMH using the AI-augmented version of the Lesion  
223 Segmentation Toolbox (LST-AI) [42–44] and based the segmentation on both T1w  
224 MPRAGE and T2w FLAIR imaging data. We then tallied WMH volumes across the  
225 frontal, temporal, parietal and occipital lobes using the UCSLobes Atlas [45].

### 226 **Statistical analyses**

227 We conducted all data analyses in RStudio (v1.3.1073; R v4.0.2) using lavaan (v0.6-  
228 16). We created figures using ggplot2 (v3.4.3) and the ENIGMA toolbox [46].

229 We carried out univariate and bivariate LGCM analyses. (B)LGCMs [47] are a  
230 powerful class of structural equation models (SEM) to describe sample average  
231 trajectories of one or two constructs over time through the specification of latent  
232 intercepts and latent slopes (i.e, initial levels and rates of change). First, we used  
233 univariate analyses for contextualisation to examine what covariates were

234 associated with the baseline measurements, as well as with potential changes over  
235 repeated measures. We then focused on bivariate models to examine  
236 interrelationships between WMH and cortical thickness over time (Figure 1). Intra-  
237 domain and cross-domain relationships can be assessed via the covariance between  
238 these four latent growth parameters [48]. We specifically tested the evidence of four  
239 possible major cross-domain relationships:

- 240 1. *intercept-intercept covariance*  $\sigma_{\iota_{WMH} \Leftrightarrow \iota_{Thick}}$ : upon study entry, do individuals  
241 with larger WMH volumes have lower cortical thickness?,
- 242 2. *intercept-slope covariance*  $\sigma_{\iota_{WMH} \Leftrightarrow \Delta_{Thick}}$ : do individuals with larger WMH  
243 volumes at study entry experience faster cortical thinning [cerebrovascular  
244 hypothesis]?,
- 245 3. *intercept-slope covariance*  $\sigma_{\iota_{Thick} \Leftrightarrow \Delta_{WMH}}$ : do individuals with thinner cortices at  
246 study entry exhibit a faster increase in WMH volumes [neurodegenerative  
247 hypothesis]?, and
- 248 4. *slope-slope covariance*  $\sigma_{\Delta_{Thick} \Leftrightarrow \Delta_{WMH}}$ : do individuals exhibiting faster WMH  
249 volume increases also undergo faster cortical thinning over time?

250 We also studied within-domain *intercept-slope covariances* ( $\sigma_{\iota_{WMH} \Leftrightarrow \Delta_{WMH}}$  and  
251  $\sigma_{\iota_{Thick} \Leftrightarrow \Delta_{Thick}}$ ) to determine whether baseline levels were associated with ongoing  
252 changes over time.

253 We conducted global and regional analyses to identify associations at two levels of  
254 granularity. In the global analysis—with no spatial specificity—we focused on the  
255 interrelationship between mean cortical thickness and total WMH volume. In order to  
256 elucidate potential region-specific and cross-domain relationships, we additionally  
257 examined all possible pairs of lobar WMH volumes and regional cortical thicknesses

258 within Desikan-Killiany atlas regions. Note that our approach is similar to a mass-  
259 univariate analysis scheme, with the difference being that we investigate region-  
260 specific effects through LGCM rather than through GLM. To reduce the  
261 dimensionality and thereby improve the feasibility of our multivariate SEM analysis,  
262 we considered (corresponding) bilateral regions jointly. We used the superscripts  
263 <sup>Global</sup> and <sup>Regional</sup> to indicate the type of analysis utilised to generate the reported  
264 values. We report the completely standardised solutions and provide unstandardised  
265 solutions as Supplementary Material.

## 266 **Adjusting for covariates and confounders**

267 We adjusted latent intercepts and slopes for effects of age, sex, years of education,  
268 total cardiovascular risk factor score, and total intracranial volume (TICV) in all  
269 models.

## 270 **Data transformation**

271 We applied a Box-Cox transform to WMH volumes to account for potential skewness  
272 and z-scored all variables (pooled across timepoints) prior to model fitting. For the  
273 purpose of contextualisation and plotting, we back-transformed the fitted growth  
274 curve parameters afterwards.

## 275 **Model fitting**

276 We employed the maximum likelihood robust estimator to fit the model. We used the  
277 full information maximum likelihood estimation to handle missing values. To check  
278 for compliance with the assumption of missingness at random, we tested whether  
279 missingness in one column (1: missing; 0: not missing) could be predicted from the  
280 remaining ones. In all instances, the resulting  $p$ -values exceeded 0.05.

281 Prior to model fitting and solely to ensure model fit, we used Tukey's fences to  
282 identify and remove outliers in all data points (threshold of 1.5) [49]. We evaluated  
283 the fit of all global and regional models by analysing their root mean square error of  
284 approximation (RMSEA; values  $\leq 0.05$  indicate good fit), comparative fit index (CFI;  
285 values exceeding 0.95 indicate good fit), and standardised root mean residual  
286 (SRMR; values  $< 0.08$  suggest good fit) [50]. For the sake of transparency, when  
287 discussing the models, we disclosed their convergence and compliance with the  
288 aforementioned thresholds.

### 289 **Correction for multiple comparisons**

290 We employed the False Discovery Rate (FDR) correction [51] method to account for  
291 the issue of multiple comparisons on all region-wise analyses (Figure S1 contains  
292 the uncorrected version).

## 293 **Results**

### 294 **Study participants**

295 We included 436 cognitively unimpaired DELCODE participants with imaging data  
296 available for at least three visits (1834 MRI sessions; median age 69.70 [IQR 65.44,  
297 74.49] years; 52.98% females; median years of education 14 [IQR 13, 17]).

## 298 **Univariate findings**

### 299 **WMH volumes increased over the course of four years**

#### 300 **Model fit**

301 All univariate LGCM on total and lobar WMH volumes converged and provided good  
302 model fit ( $RMSEA \leq 0.05$ ,  $CFI \geq 0.095$ ,  $SRMR \leq 0.05$ ).

#### 303 **Demographic effects on latent intercept ( $\iota_{WMH}$ )**

304 Baseline total WMH volumes varied significantly among individuals (variance of  $\iota_{WMH}^{Global}$   
305 = 0.881,  $SE = 0.033$ ,  $Z = 25.117$ ,  $p$ -value < 0.001).

306 Total WMH volumes were larger in older individuals ( $\beta_{Age \rightarrow \iota_{WMH}}^{Global} = 0.365$ ,  $SE = 0.043$ ,  
307  $Z = 8.462$ ,  $p$ -value < 0.001) and in those with higher total cardiovascular risk factor  
308 scores ( $\beta_{Vascular\ risk \rightarrow \iota_{WMH}}^{Global} = 0.090$ ,  $SE = 0.045$ ,  $Z = 1.978$ ,  $p$ -value = 0.048). Moreover,  
309 WMH across the temporal lobes tended to be higher in those with fewer years of  
310 education (Figure 2;  $\beta_{Education \rightarrow \iota_{WMH}}^{Regional} = -0.099$ ,  $SE = 0.058$ ,  $Z = -1.715$ ,  $p$ -value =  
311 0.086).

312 Females had larger total WMH volumes than males ( $\beta_{Female \rightarrow \iota_{WMH}}^{Global} = 0.175$ ,  $SE =$   
313 0.062,  $Z = 2.830$ ,  $p$ -value = 0.005), especially across frontal brain regions  
314 ( $\beta_{Female \rightarrow \iota_{WMH}}^{Regional} = 0.184$ ,  $SE = 0.064$ ,  $Z = 2.955$ ,  $p$ -value = 0.003), despite females in our  
315 sample being on average younger ( $\sigma_{Age \rightleftharpoons Female}^{Global} = -0.168$ ,  $SE = 0.047$ ,  $Z = -3.598$ ,  
316  $p$ -value < 0.001) and having lower total cardiovascular risk scores ( $\sigma_{Vascular\ risk \rightleftharpoons Female}^{Global}$   
317 = -0.195,  $SE = 0.045$ ,  $Z = -4.305$ ,  $p$ -value < 0.001) than males. In addition, females

318 had on average fewer years of education ( $\sigma_{\text{Education} \rightarrow \text{Female}}^{\text{Global}} = -0.233, SE = 0.044, Z = -$   
319  $5.346, p\text{-value} < 0.001$ ) than males.

## 320 **Demographic effects on latent slope ( $\Delta_{\text{WMH}}$ )**

321 Across participants, total WMH volumes increased over the follow-up period of four  
322 years (Figure 2A,B; intercept of  $\Delta_{\text{WMH}}^{\text{Global}} = 1.066, SE = 0.101, Z = 10.573, p\text{-value} <$   
323  $0.001$ ). The frontal and parietal lobes underwent the most substantial progression in  
324 WMH volumes, with an average increase of 0.180 [95%-CI 0.153, 0.207] and 0.175  
325 [95%-CI 0.137, 0.212] ml per year, respectively. Significant WMH progression  
326 occurred in occipital and temporal lobes as well (approximated average rates of  
327 change: 0.034 [95%-CI 0.027, 0.042], 0.018 [IQR 0.015, 0.022] ml per year,  
328 respectively).

329 A strength of the approach is the quantification of WMH progression rate variability  
330 across individuals (Figure 2B; variance of  $\Delta_{\text{WMH}}^{\text{Global}} = 0.991, SE = 0.012, Z = 80.306,$   
331  $p\text{-value} < 0.001$ ), which we found to be tied to baseline demographics and pre-  
332 existing WMH volumes. WMH progression rates in parietal regions were lower in  
333 individuals with advanced age ( $\beta_{\text{Age} \rightarrow \Delta_{\text{WMH}}}^{\text{Regional}} = -0.233, SE = 0.068, Z = -3.431, p\text{-value} =$   
334  $0.001$ ) and with more years of education (Figure 2C;  $\beta_{\text{Education} \rightarrow \Delta_{\text{WMH}}}^{\text{Regional}} = -0.166, SE =$   
335  $0.066, Z = -2.506, p\text{-value} = 0.036$ ). Similarly, those with the highest initial regional  
336 WMH volumes tended to exhibit the least progression of WMH in the same region  
337 over time (parietal:  $\beta_{\text{WMH} \rightarrow \Delta_{\text{WMH}}}^{\text{Regional}} = -0.305, SE = 0.066, Z = -4.654, p\text{-value} < 0.001;$   
338 occipital: ( $\beta_{\text{WMH} \rightarrow \Delta_{\text{WMH}}}^{\text{Regional}} = -0.159, SE = 0.078, Z = -2.032, p\text{-value} = 0.042;$  temporal:  
339  $\beta_{\text{WMH} \rightarrow \Delta_{\text{WMH}}}^{\text{Regional}} = -0.247, SE = 0.125, Z = -1.982, p\text{-value} = 0.048$ ), except in the frontal  
340 lobe ( $\beta_{\text{WMH} \rightarrow \Delta_{\text{WMH}}}^{\text{Regional}} = -0.102, SE = 0.080, Z = -1.275, p\text{-value} = 0.202$ ). Sex differences

341 in WMH progression rates were evident across the occipital lobe, with females  
342 showing faster occipital WMH progression than males (Figure 2C;  $\beta_{\text{Female} \rightarrow \Delta_{\text{WMH}}}^{\text{Regional}} =$   
343 0.221,  $SE = 0.088$ ,  $Z = 2.510$ ,  $p\text{-value} = 0.012$ ).

## 344 **Cortical thickness decreased over the course of four years**

### 345 **Model fit**

346 All univariate LGCM fitted to cortical thickness converged and had good fit indices  
347 ( $RMSEA \leq 0.05$ ,  $CFI \geq 0.095$ ,  $SRMR \leq 0.05$ ).

### 348 **Demographic effects on latent intercept ( $\iota_{\text{Thick}}$ )**

349 Cortical thickness values were, on average, lower in individuals with advanced age  
350 ( $\beta_{\text{Age} \rightarrow \iota_{\text{Thick}}}^{\text{Global}} = -0.190$ ,  $SE = 0.024$ ,  $Z = -8.077$ ,  $p\text{-value} < 0.001$ ), especially within  
351 cortical regions associated with processing sensory information and orchestrating  
352 motor functions (peaks - postcentral:  $\beta_{\text{Age} \rightarrow \iota_{\text{Thick}}}^{\text{Regional}} = -0.342$ ,  $SE = 0.045$ ,  $Z = -7.666$ ,  
353  $p\text{-value} < 0.001$ ; superiortemporal:  $\beta_{\text{Age} \rightarrow \iota_{\text{Thick}}}^{\text{Regional}} = -0.352$ ,  $SE = 0.044$ ,  $Z = -7.937$ ,  
354  $p\text{-value} < 0.001$ ; superiorfrontal:  $\beta_{\text{Age} \rightarrow \iota_{\text{Thick}}}^{\text{Regional}} = -0.309$ ,  $SE = 0.044$ ,  $Z = -7.035$ ,  $p\text{-value} <$   
355 0.001). We did not observe sufficient evidence relating sex or cardiovascular risk  
356 factors to initial cortical measurements in the cognitively unimpaired cohort  
357 investigated here.

### 358 **Demographic effects on latent slope ( $\Delta_{\text{Thick}}$ )**

359 The thickness of cerebral cortex generally decreased over the course of four years  
360 (Figure 2D,E; intercept of  $\Delta_{\text{Thick}}^{\text{Global}} = -0.269$ ,  $SE = 0.082$ ,  $Z = -3.263$ ,  $p\text{-value} = 0.001$ ).  
361 Global thinning rates varied substantially among individuals (Figure 2E; variance

362  $\Delta_{Thick}^{Global} = 0.958, SE = 0.035, Z = 27.413, p\text{-value} < 0.001$ ). Thinning was particularly  
363 pronounced across the cingulate and temporal cortex (Figure 2D, F; intercept of  
364  $\Delta_{Thick}^{Global}$  peaked in the caudal anterior cingulate cortex =  $-0.875, SE = 0.107, Z = -$   
365  $8.196, p\text{-value} < 0.001$ ). Caudal anterior and posterior cingulate cortices, for  
366 instance, underwent the most cortical thinning over the course of four years, with an  
367 average decrease in thickness of  $-0.014$  [IQR  $-0.016, -0.013$ ] and  $-0.011$  [95%-CI  $-$   
368  $0.012, -0.009$ ] mm/year, respectively. Annual cortical thinning rates tended to  
369 decelerate with advance age ( $\beta_{Age \rightarrow \Delta_{Thick}}^{Global} = -0.147, SE = 0.089, Z = -1.652, p\text{-value} =$   
370  $0.098$ ). Neither global or regional analyses hinted at an association between sex,  
371 years of education, cardiovascular risk score, and changes in cortical thickness in  
372 our cohort.

## 373 **Bivariate findings**

### 374 **Model fit**

375 All BLGCMs also converged and had a satisfactory model fit ( $RMSEA \leq 0.05, CFI \geq$   
376  $0.095, SRMR \leq 0.05$ ).

### 377 **Individuals with larger WMH volumes have lower cortical thickness**

#### 378 $(\sigma_{l_{WMH} \rightarrow l_{Thick}})$

379 At baseline, individuals with larger WMH volumes showed lower mean cortical  
380 thickness ( $\sigma_{l_{WMH} \rightarrow l_{Thick}}^{Global} = -0.160, SE = 0.049, Z = -3.285, p\text{-value} = 0.001$ ).  
381 Subsequent analysis of regional measurements revealed that this association was  
382 more pronounced within the same lobe (Figure 3A): frontal WMH related more  
383 strongly to the frontal cortex (peak at parstriangularis:  $\sigma_{l_{WMH} \rightarrow l_{Thick}}^{Regional} = -0.177, SE =$



384 0.050,  $Z = -3.564$ ,  $p$ -value  $< 0.001$ ), occipital WMH to the occipital cortex (peak at  
385 cuneal cortex:  $\sigma_{l_{WMH} \leftrightarrow l_{Thick}}^{Regional} = -0.162$ ,  $SE = 0.055$ ,  $Z = -2.957$ ,  $p$ -value = 0.003), and  
386 parietal WMH to the parietal cortex (peak at postcentral cortex:  $\sigma_{l_{WMH} \leftrightarrow l_{Thick}}^{Regional} = -0.129$ ,  
387  $SE = 0.057$ ,  $Z = -2.274$ ,  $p$ -value = 0.023). However, we also observed associations  
388 across distal regions (Figure 3A), for instance, baseline frontal WMH volumes and  
389 cortical thickness in temporal brain regions, occipital WMH volumes and frontal  
390 cortical thickness.

### 391 **Individuals with larger WMH volumes show faster cortical thinning**

#### 392 $(\sigma_{l_{WMH} \leftrightarrow \Delta_{Thick}})$

393 Although the association between WMH volumes at baseline and cortical thinning  
394 rates was not observed at a global scale ( $\sigma_{l_{WMH} \leftrightarrow \Delta_{Thick}}^{Global} = -0.121$ ,  $SE = 0.076$ ,  $Z = -$   
395  $1.595$ ,  $p$ -value = 0.111), it was at a regional scale (Figure 3B). Individuals who  
396 exhibited a steeper decrease in thickness of the cingulate cortices showed larger  
397 WMH volumes across the frontal (Figure 4A.1; peak at caudal anterior:  
398  $\sigma_{l_{WMH} \leftrightarrow \Delta_{Thick}}^{Regional} = -0.244$ ,  $SE = 0.079$ ,  $Z = -3.091$ ,  $p$ -value = 0.002), parietal (peak at  
399 caudal anterior:  $\sigma_{l_{WMH} \leftrightarrow \Delta_{Thick}}^{Regional} = -0.260$ ,  $SE = 0.079$ ,  $Z = -3.302$ ,  $p$ -value = 0.001), and  
400 occipital lobes (peak at caudal anterior:  $\sigma_{l_{WMH} \leftrightarrow \Delta_{Thick}}^{Regional} = -0.260$ ,  $SE = 0.079$ ,  $Z = -$   
401  $3.302$ ,  $p$ -value = 0.001). Individuals with larger occipital WMH at baseline also  
402 showed a steeper decline in thickness in adjacent cortical regions, such as the  
403 inferior parietal cortex (Figure 3B;  $\sigma_{l_{WMH} \leftrightarrow \Delta_{Thick}}^{Regional} = -0.247$ ,  $SE = 0.094$ ,  $Z = -2.611$ ,  
404  $p$ -value = 0.009), but also in more remote cortical areas like the superior temporal

405 cortex ( $\sigma_{\iota_{WMH}^{\text{Regional}} \leftrightarrow \Delta_{Thick}} = -0.316, SE = 0.084, Z = -3.749, p\text{-value} < 0.001$ ) and the  
406 insular cortex ( $\sigma_{\iota_{WMH}^{\text{Regional}} \leftrightarrow \Delta_{Thick}} = -0.312, SE = 0.091, Z = -3.425, p\text{-value} = 0.001$ ).

407 **Individuals with thinner cortices exhibit faster increases in WMH**  
408 **volumes ( $\sigma_{\iota_{Thick} \leftrightarrow \Delta_{WMH}}$ )**

409 Individuals with thinner cortices at baseline tended to undergo faster WMH  
410 progression over the span of four years ( $\sigma_{\iota_{Thick} \leftrightarrow \Delta_{WMH}}^{\text{Whole-brain}} = -0.123, SE = 0.063, Z = -$   
411  $1.964, p\text{-value} = 0.049$ ). Upon closer examination of these associations, we found  
412 evidence for regional specificities (Figure 3C). Individuals with thicker cingulate  
413 cortices at baseline, particularly at the isthmus, experienced a slower progression in  
414 parietal WMH volumes compared to those with thinner cortices (Figure 3C;  
415  $\sigma_{\iota_{Thick} \leftrightarrow \Delta_{WMH}}^{\text{Regional}} = -0.205, SE = 0.064, Z = -3.185, p\text{-value} = 0.001$ ). Furthermore,  
416 participants with initially thicker precentral, insular, and rostral anterior cingulate  
417 cortices showed a slower progression in occipital WMH volumes (Figure 3C, 4A.2;  
418 precentral:  $\sigma_{\iota_{Thick} \leftrightarrow \Delta_{WMH}}^{\text{Regional}} = -0.206, SE = 0.074, Z = -2.791, p\text{-value} = 0.005$ ; insular:  
419  $\sigma_{\iota_{Thick} \leftrightarrow \Delta_{WMH}}^{\text{Regional}} = -0.218, SE = 0.079, Z = -2.743, p\text{-value} = 0.006$ ; rostral anterior:  
420  $\sigma_{\iota_{Thick} \leftrightarrow \Delta_{WMH}}^{\text{Regional}} = -0.183, SE = 0.068, Z = -2.679, p\text{-value} = 0.007$ ).

421 **Individuals exhibiting faster WMH volume increases also undergo**  
422 **faster cortical thinning over time ( $\sigma_{\Delta_{Thick} \leftrightarrow \Delta_{WMH}}$ )**

423 While we found no clear indication for global slope-slope associations  
424 ( $\sigma_{\Delta_{Thick} \leftrightarrow \Delta_{WMH}}^{\text{Global}} = -0.149, SE = 0.145, Z = -1.026, p\text{-value} = 0.305$ ), we did observe that  
425 individuals with faster progression of WMH in the frontal lobe tended to undergo

426 faster global cortical thinning over time ( $\sigma_{\Delta_{Thick} \leftrightarrow \Delta_{WMH}}^{Global} = -0.269$ ,  $SE = 0.145$ ,  $Z = -$   
427  $1.861$ ,  $p$ -value = 0.063). Further exploration revealed that this relationship was  
428 evident in the caudal middle frontal, paracentral, posterior cingulate, and superior  
429 frontal cortex (Figure 4B, S1; peaks – caudal middle frontal:  $\sigma_{\Delta_{Thick} \leftrightarrow \Delta_{WMH}}^{Regional} = -0.611$ ,  
430  $SE = 0.243$ ,  $Z = -2.516$ ,  $p$ -value = 0.012; paracentral:  $\sigma_{\Delta_{Thick} \leftrightarrow \Delta_{WMH}}^{Regional} = -0.288$ ,  $SE =$   
431  $0.122$ ,  $Z = -2.361$ ,  $p$ -value = 0.018; posterior cingulate:  $\sigma_{\Delta_{Thick} \leftrightarrow \Delta_{WMH}}^{Regional} = -0.296$ ,  $SE =$   
432  $0.125$ ,  $Z = -2.359$ ,  $p$ -value = 0.018; superior frontal:  $\sigma_{\Delta_{Thick} \leftrightarrow \Delta_{WMH}}^{Regional} = -0.336$ ,  $SE =$   
433  $0.152$ ,  $Z = -2.216$ ,  $p$ -value = 0.027). Slope-slope associations were generally  
434 characterised by sparsity, with only a few regions showing statistical significance.  
435 Consequently, they collectively did not remain significant after FDR correction and  
436 should thus be interpreted with caution (FDR-corrected version: Figure 3D;  
437 uncorrected version: Figure S1).

## 438 Discussion

439 We studied the interrelationships between WMH and cortical thickness over a four-  
440 year period in 436 older adults without objective cognitive impairment (1834 MRI  
441 sessions in total) using a longitudinal modelling approach. We made both  
442 methodological and clinical contributions to the ongoing efforts to understand the  
443 relationship between cerebrovascular dysfunction and neurodegeneration. First, our  
444 study demonstrates the potential of integrating surface-based morphometry and  
445 BLGCM to investigate interrelationships between neuroimaging markers over time.  
446 Second, our findings support the notion that cortical thinning and WMH progression  
447 might be mutually reinforcing processes, entangled over a four-year period in a  
448 complex and region-specific manner. Our results suggest that this coupling takes

449 place even among individuals with a low vascular risk, given DELCODE's inclusion  
450 and exclusion criteria.

## 451 **WMH progression**

452 WMH generally progressed over the course of four years, reiterating that ageing is  
453 associated with WMH increase and constitutes a major risk factor for white matter  
454 pathology [2,14,15,28,52]. Progression rates were nonetheless highly subject-  
455 specific and dependent on an individual's pre-existing white matter pathology.  
456 Parietal, occipital, and temporal WMH progression rates over four years were lower  
457 in subjects who had larger WMH volumes at the time of the baseline visit. This  
458 suggests that WMH progression may follow a non-linear trajectory, with changes  
459 occurring swiftly in its early stages, but gradually reaching a plateau. While non-  
460 linear trajectories would be conceivable at late stages of cerebral small vessel  
461 disease (CSVD) spectrum, our finding suggest that this phenomenon also applies to  
462 individuals with low-to-average WMH volumes (compared to CSVD cohorts, see  
463 [52,53]), was somewhat unexpected, albeit not a completely novel finding. The  
464 apparent non-Markovian nature of WMH progression has recently been discussed in  
465 the context of the RUN DMC study [54]. In the RUN DMC study, the total WMH  
466 burden around the age of 64 years predicted their progression over the following 11  
467 years, with severe WMH cases progressing the most, and mild cases progressing  
468 the least [54]. Mild cases rarely progressing to severe stages [54]. Here, we found  
469 that such non-linear trajectories were observable at a study level. However,  
470 significant individual differences in WMH volume changes suggest that there are  
471 numerous other factors that were not accounted for in our study that might contribute  
472 to subject-specific progression of WMH in ageing. For example, heterogeneity of

473 WMH volumes and progression rates could be reflective of the brain's ability to  
474 respond to and heal from white matter injuries. By extension, heterogeneity of WMH  
475 volumes and progression rates could be reflective of past and current socioeconomic  
476 status and cardiovascular risk factors, as well as the adoption of an unhealthy  
477 lifestyle [2,54,55]. This might explain why lower years of education and greater  
478 cardiovascular risk scores were associated with higher baseline WMH volumes in  
479 our sample.

480 Interestingly, even though, in our study sample, males were generally older than  
481 females and had higher cardiovascular risk factor scores than females, females  
482 showed significantly greater WMH volumes at baseline compared to males even  
483 after accounting for TICV. Total WMH progression rates over the course of four  
484 years between sexes were nonetheless comparable, except in the occipital lobe,  
485 where females exhibited faster progression. For these two scenarios to be  
486 compatible, WMH would clearly need to evolve faster in females than in males in  
487 other cerebral lobes before the age of 70 years (i.e., the median age in this study).  
488 Menopause may constitute a potential explanation for this sex-specific susceptibility  
489 to WMH. A relatively recent work in the Rhineland study, a large population-based  
490 German cohort, found that while pre-menopausal women and men of similar age did  
491 not differ in WMH volumes, post-menopausal women did have significantly larger  
492 WMH volumes compared to men of similar age [56]. This finding suggests that  
493 indeed menopause and accompanying hormonal and physiological changes might  
494 be behind this sex-difference[56]. Another explanation could be that elderly women  
495 in this ageing cohort had, on average, lower educational attainment, which could  
496 also contribute to their vulnerability to CSVD. The likely multifactorial nature of this  
497 finding requires careful consideration during modelling and reporting as well as

498 dedicated analysis shedding light on the mechanisms potentially mediating such a  
499 vulnerability.

500 Albeit less commonly, a small number of participants exhibited clear and consistent  
501 WMH volume regression throughout the study period, as reported in previous  
502 literature [14,57]. The most pronounced case of WMH volume regression was  
503 observed in a female participant in her 60s, with a total cardiovascular risk score of  
504 0.0, and 15 years of education (higher education). Regression in this participant was  
505 most noticeable in occipital brain regions and could be attributed to a loss of  
506 periventricular tissue caused by a substantial enlargement of the occipital horns of  
507 the lateral ventricles over time (Figure S2). While frequently discussed in the context  
508 of a radiological or technical issue [57], our finding adds a new dimension to the  
509 current explanations for WMH regression, wherein genuine changes in one  
510 neuroimaging marker can directly influence another. This finding strongly highlights  
511 the need for multimodal longitudinal strategies to gain a more comprehensive  
512 understanding of the synergistic role of cerebrovascular and neurodegenerative  
513 processes.

## 514 **Cortical thinning**

515 The thickness of the cerebral cortex decreased over the course of four years,  
516 corroborating that ageing also drives cortical thinning [7,58]. The rate at which  
517 thinning occurred was nonetheless subject- and region-specific. Cortical regions  
518 associated with sensory and sensorimotor functions appeared to be the earliest  
519 affected and most decreased by ageing. A decline in cortical thickness across these  
520 regions might contribute to decreased visual acuity, hearing sensitivity, and motor  
521 abilities [58–61]—all of which are expected during normal ageing, but were not

522 examined as per the objectives of the current work. We also found substantial  
523 evidence of thinning across the cingulate cortex. This apparent ageing-related  
524 vulnerability is consistent with previous research indicating that both the caudal  
525 anterior and posterior cingulate cortex shrink during normal ageing [62]. The  
526 behavioural consequences of the rate of thinning in terms of decline in cognitive  
527 control and integrating behavioural, affective, and cognitive processes [63], remain to  
528 be elucidated.

529 Cortical thinning shows considerable heterogeneity across subjects. Somewhat  
530 surprisingly such inter-subject variability could not be fully explained by age, sex,  
531 years of education or cardiovascular risk factors, suggesting that other factors, e.g.,  
532 genetics and lifestyle factors beyond cardiovascular risk factors [10–13], might  
533 influence cortical thinning during late life, possibly to a larger extent than  
534 demographics and established cardiovascular risk factors. Given that the rate of  
535 thinning might affect cognitive performance and activities of daily living, future  
536 research should determine the contribution of brain resilience and (modifiable)  
537 lifestyle factors to abnormal cortical thinning, as such findings could advance the  
538 development of novel interventions [64].

## 539 **Co-occurrence beyond common risk factors**

540 Even after adjusting for shared risk factors, we found evidence for a negative  
541 correlation between the initial thickness of the cerebral cortex and the initial volume  
542 of WMH, in line with previous work [3,6,10,23–25]. While other factors may  
543 contribute to this relationship, which we did not include in our analysis (e.g., genetics  
544 and lifestyle), this observation, found in a relatively healthy sample, suggests shared  
545 underlying pathological mechanisms.

## 546 **WMH and cortical thinning**

547 The initial volume of WMH in the brain partly explained the rate of thinning observed  
548 across multiple cortical regions over four years. This observation is consistent with  
549 the cerebrovascular hypothesis [1,65–67] and supports the notion that WMH are the  
550 visible tip of the iceberg [1], a sign of widespread rather than focal cerebrovascular  
551 and metabolic impairment [68,69]. The apparent region-specific nature of the  
552 coupling between lobar WMH and regional cortical thickness raises the possibility  
553 that white matter fibres could be involved in the downstream effects of WMH.  
554 Potential secondary effects of WMH along the superior and inferior longitudinal  
555 fasciculus may, for instance, explain why those with occipital WMH would experience  
556 rapid thinning simultaneously across the temporal cortex and the cingulate cortex,  
557 including its rostral anterior regions. Mounting data indeed suggests that abnormal  
558 tissue characteristics can be found in intra- and perilesional white matter regions, but  
559 also in white matter fibres traversing WMH [1,27,69,70]. Also, cross-sectional  
560 investigations conducted in CSVD cohorts have demonstrated that cortical regions  
561 connected to incident lacunes, subcortical lacunar infarcts, and WMH through white  
562 matter fibers exhibit significantly reduced thickness than those that are not [30,65–



563 67]. Despite the overall compelling evidence for a contribution of WMH to cortical  
564 thinning, additional research leveraging imaging techniques like white matter  
565 tractography as well as animal models is needed to elucidate the role of white matter  
566 fibres in the long-term and remote effects of WMH in the brain.

### 567 **Cortical thickness and WMH progression**

568 The rate of WMH volumes increase over four years was partly explained by the  
569 thickness of the cerebral cortex at study enrolment, with slower WMH progression  
570 occurring in participants with higher initial cortical thicknesses. This may indicate  
571 potentially higher brain maintenance as a mechanism of healthy ageing [71]. This  
572 relationship was particularly evident when examining WMH progression across  
573 occipital regions in relation to insular and precentral cortex thickness at baseline.  
574 The simultaneous association of insular and precentral cortex thickness with WMH  
575 development may be multifaceted. Neuronal loss in both cortical regions may be  
576 linked to lifestyle adaptations stemming from ageing that contribute to a decline in  
577 sensorimotor functions—a primary risk factor for cardiovascular disease [72].  
578 Considering the involvement of the insular cortex in the regulation of autonomic  
579 functions, a decline in this region could also result in blood pressure dysregulation  
580 [73,74], a condition which has been extensively shown to be associated with  
581 increased progression of WMH, and with more severe manifestations of CSVD  
582 [28,54,75].

583 The association between baseline cortical thickness and posterior WMH progression  
584 has a fundamental ramification: it supports the spatial heterogeneity of WMH, with  
585 neurodegeneration relating more to the progression of WMH in parietal and occipital  
586 regions than in frontal ones. Since cortical neurodegeneration accelerates with the

587 pathophysiology of Alzheimer’s disease (AD), this would explain why posterior WMH  
588 appear in subjects with minimal vascular pathology across the AD spectrum and why  
589 WMH in deep and periventricular posterior regions appear characteristics of AD  
590 [26,36,38,76]. It is also possible that an early (preclinical) increase in biomarkers  
591 indicative for AD may cause changes in the insular cortex, which then affects the  
592 cardiovascular system [73,74,77] and ultimately speeds up the progression of WMH  
593 in the brain—a possible explanation for Figure 3C. While promising, further research  
594 in other cohorts—especially with available amyloid- or tau- positron emission  
595 tomography [78]—are needed to determine how age- and AD-driven cortical  
596 neurodegeneration influences posterior WMH [76].

#### 597 **WMH progression and cortical thinning**

598 WMH progression and cortical thinning rates were associated with one another,  
599 suggesting a rather consistent and predictable relationship between the two  
600 processes, wherein changes in one marker are accompanied by corresponding  
601 changes in the other and *vice versa*. In our group of cognitively unimpaired  
602 participants, this slope-slope association was particularly evident across frontal brain  
603 regions. This pattern seems to be less confined and more widespread with advanced  
604 stages of AD, as highlighted in a recent work with autosomal dominant AD and late-  
605 onset AD [33]. Further application of our methodology to cohorts at various stages of  
606 AD could, for example, provide further information on the mechanisms underlying the  
607 simultaneous progression of both processes.

#### 608 **Strengths and contextualisation**

609 Longitudinal studies with cognitively unimpaired elderly participants exploring cross-  
610 domain associations between WMH and cortical thickness are scarce [1,4,79].

611 Whenever this kind of research has been done, the evidence supporting any kind of  
612 coupling has generally been lacking. In septuagenarian community-dwelling  
613 participants, Dickie et al. [4] could not find enough evidence supporting the  
614 relationship between total WMH volumes and cortical thickness of cortical grey  
615 matter structures neighbouring the Sylvian fissures over a three-year period. In a  
616 cohort of cognitively unimpaired participants, Hotz et al. [79] investigated cross-  
617 domain associations between total WMH volume and thinning of the entorhinal  
618 cortex over a duration of seven years using BLGCM. The authors found no evidence  
619 for cross-domain coupling and this absence of association was evident both at the  
620 study's baseline and throughout its duration. Our findings are also compatible with  
621 the observation that patients with multiple sclerosis (MS), a neuroinflammatory  
622 condition primarily affecting white matter fiber tracts through demyelination, exhibit  
623 focal thinning of cortical areas [80,81].

624 Evidence supporting cross-domain has been, nonetheless, growing in participants  
625 symptomatic or more severe presentations of cerebrovascular [65–67,78,82] and  
626 neurodegenerative pathologies [33,78]. One potential explanation thus far for  
627 contradictory results could be the stage of dysfunction at which each participant is  
628 situated, i.e., coupling only becomes evident at advanced, symptomatic stages of  
629 cerebrovascular and neurodegenerative disease. On the other hand, as emphasised  
630 by our study, there are regional nuances to these cross-domain relationships that  
631 analyses with a lower level of granularity might fail to capture. Had we solely relied  
632 on global analyses for our study, we would have essentially been limited to  
633 observing nothing beyond the evident intercept-intercept association. This  
634 underscores the significance of employing multimodal and regional approaches to

635 gain a more comprehensive understanding of the local and distant effects of one  
636 process on the other.

## 637 **Limitations**

638 Our research has three main limitations. First, even though our BLGCM aligns with  
639 the data, causality remains elusive due to model equivariance. Latent change score  
640 models might be promising for further study of specific interactions over discrete time  
641 intervals [83]. The mass-univariate application of the BLGCM could be streamlined  
642 by using extended measurement models [84]. We can state, however, that our data  
643 supports a specific and partial spatiotemporal coupling between cortical  
644 neurodegeneration and cerebrovascular dysfunction. The specific circumstances that  
645 might lead to such coupling often remain undetermined and likely require the  
646 inclusion of more extensive biological parameters including complementary imaging  
647 modalities, such as diffusion tensor imaging [27,78,80]. If a Wallerian-like  
648 degeneration is responsible for the observed coupling—as also discussed in the  
649 literature [3,5,9,17,26,34,85]—there should be evidence within the white matter  
650 fibres themselves that mediate the interrelationships between cortical thickness and  
651 WMH. Second, we included a relatively healthy sample and a short time span (48  
652 months, i.e., 4 years), which may have prevented a few cross-domain associations  
653 to become evident. The dynamics over longer time periods, as well as in other  
654 cohorts thus remain elusive, but will be a matter of future investigation. Third, we  
655 have, thus far, not assessed potential cognitive sequelae of WMH progression,  
656 cortical thinning, or their coupling in this study. Because these two processes appear  
657 to be coupled prior to any observable objective cognitive deficiencies, it could be that  
658 cognitive consequences are not detectable at this asymptomatic stage or that

659 cognitive reserve is still able to compensate for the ongoing pathology or, as a recent  
660 study suggests, that cortical measurements predict well chronological age but not  
661 memory performance [86]. A trivariate latent change score model with WMH, cortical  
662 thickness, and cognitive performance could be used in the future to address this  
663 limitation.

## 664 **Conclusion**

665 Our work provides longitudinal evidence that cortical thinning and WMH progression  
666 could be mutually reinforcing as opposed to parallel, disassociated processes. The  
667 coupling between these two neuroradiological features appears to be entangled prior  
668 to the onset of any detectable cognitive deficits. Our findings support the ongoing  
669 discussion on perilesional and remote impacts of WMH, but, at the same time,  
670 provide evidence for the effects of cortical neurodegeneration on white matter  
671 integrity. Comprehensive, multimodal approaches, such as the one applied in this  
672 study, have the potential to facilitate the detection of downstream damage  
673 associated with the synergistic interaction among ageing, CSVD, and  
674 neurodegeneration in the brain.

## 675 **Declarations**

### 676 **Ethics approval and consent to participate**

677 The study protocol was approved by the ethical committees of the medical faculties  
678 of all participating sites: the ethical committees of Berlin (Charite, University  
679 Medicine), Bonn, Cologne, Goettingen, Magdeburg, Munich (Ludwig-Maximilians-  
680 University), Rostock, and Tuebingen. The process was led and coordinated by the

681 ethical committee of the medical faculty of the University of Bonn. All committees  
682 gave ethical approval for this work. All participants provided their written informed  
683 consent before inclusion in the study. DELCODE is retrospectively registered at the  
684 German Clinical Trials Register (DRKS00007966, 04/05/2015). The DELCODE  
685 study was conducted in accordance with the Declaration of Helsinki.

## 686 **Consent for publication**

687 Not applicable.

## 688 **Availability of data and materials**

689 The datasets used and analysed during the current study are available from the  
690 corresponding author on reasonable request.

## 691 **Competing interests**

692 The authors report no competing interests.

## 693 **Funding**

694 This research was supported by the German Center for Neurodegenerative  
695 Diseases (Deutsches Zentrum für Neurodegenerative Erkrankungen, DZNE;  
696 reference number BN012) and funded by the German Research Foundation  
697 (Deutsche Forschungsgemeinschaft, DFG; Project IDs 425899996 and  
698 362321501/RTG 2413 SynAGE; CRC 1436, projects A05, B02, B04 and C01). The  
699 funding bodies played no role in the design of the study or collection, analysis, or  
700 interpretation of data or in writing the manuscript.

## 701 **Author's contributions**

702 Conceptualisation: JB, IM, GZ. Methodology: JB, IM, GZ. Software: JB, IM, GZ.  
703 Formal analysis: JB. Data Acquisition: OP, JHR, SDF, JP, EJS, SA, ASc, KF, JW,  
704 BHS, FJ, AR, WG, EII, KB, DJ, ME, RP, BSR, ST, IK, CL, SSo, ASp, AE, FL, PD,  
705 SH, KS, ED. Image processing: JB, RY. Visualisation: JB. Image analysis and  
706 modelling: JB, GZ. Investigation: JB, GZ. Supervision: GZ, ED. Project  
707 administration: GZ. Funding acquisition: ED. Resources: GZ, ED. Writing original  
708 draft preparation: JB, GZ. Writing – review and editing: All authors. All authors read  
709 and approved the final manuscript.

## 710 **Acknowledgements**

711 We would like to express our gratitude to all DELCODE study participants. We also  
712 thank the Max-Delbrück-centrum für Molekulare Medizin in der Helmholtz-  
713 Gemeinschaft (MDC), Freie Universität Berlin Center for Cognitive Neuroscience  
714 Berlin (CCNB), Bernstein Center für Computational Neuroscience Berlin,  
715 Universitätsmedizin Göttingen Core Facility MR-Research in Neurosciences, Institut  
716 für Klinische Radiologie Klinikum der Universität München, and Universitätsklinikum  
717 Tübingen MR-Forschungszentrum.

## 718 **References**

719 1. Ter Telgte A, Van Leijsen EMC, Wiegertjes K, Klijn CJM, Tuladhar AM, De Leeuw  
720 FE. Cerebral small vessel disease: From a focal to a global perspective. *Nat Rev*  
721 *Neurol.* 2018;14:387–98.

- 722 2. Duering M, Biessels GJ, Brodtmann A, Chen C, Cordonnier C, de Leeuw F-E, et  
723 al. Neuroimaging standards for research into small vessel disease-advances since  
724 2013. *Lancet Neurol.* 2023;4422:2–4.
- 725 3. Appelman APA, Exalto LG, Van Der Graaf Y, Biessels GJ, Mali WPTM, Geerlings  
726 MI. White matter lesions and brain atrophy: More than shared risk factors? A  
727 systematic review. *Cerebrovascular Diseases.* 2009;28:227–42.
- 728 4. Dickie DA, Karama S, Ritchie SJ, Cox SR, Sakka E, Royle NA, et al. Progression  
729 of White Matter Disease and Cortical Thinning Are Not Related in Older Community-  
730 Dwelling Subjects. *Stroke.* 2016;47:410–6.
- 731 5. Fiford CM, Manning EN, Bartlett JW, Cash DM, Malone IB, Ridgway GR, et al.  
732 White matter hyperintensities are associated with disproportionate progressive  
733 hippocampal atrophy. *Hippocampus.* 2017;27:249–62.
- 734 6. Lambert C, Benjamin P, Zeestraten E, Lawrence AJ, Barrick TR, Markus HS.  
735 Longitudinal patterns of leukoaraiosis and brain atrophy in symptomatic small vessel  
736 disease. *Brain.* 2016;139:1136–51.
- 737 7. Bethlehem RAI, Seidlitz J, White SR, Vogel JW, Anderson KM, Adamson C, et al.  
738 Brain charts for the human lifespan. *Nature.* 2022;604:525–33.
- 739 8. Narvacan K, Treit S, Camicioli R, Martin W, Beaulieu C. Evolution of deep gray  
740 matter volume across the human lifespan. *Hum Brain Mapp.* 2017;38:3771–90.
- 741 9. Jouvent E, Viswanathan A, Chabriat H. Views and Reviews Cerebral Atrophy in  
742 Cerebrovascular Disorders. 2009;213–8.



- 743 10. Enzinger C, Fazekas F, Matthews PM, Ropele S, Schmidt H, Smith S, et al. Risk  
744 factors for progression of brain atrophy in aging: Six-year follow-up of normal  
745 subjects. *Neurology*. 2005;64:1704–11.
- 746 11. Carmelli D, Swan GE, Reed T, Wolf PA, Miller BL, DeCarli C. Midlife  
747 cardiovascular risk factors and brain morphology in identical older male twins.  
748 *Neurology*. 1999;52:1119–24.
- 749 12. Ong M, Foo H, Chander RJ, Wen MC, Au WL, Sitoh YY, et al. Influence of  
750 diabetes mellitus on longitudinal atrophy and cognition in Parkinson’s disease. *J*  
751 *Neurol Sci* [Internet]. 2017;377:122–6. Available from:  
752 <http://dx.doi.org/10.1016/j.jns.2017.04.010>
- 753 13. Xu J, Li Y, Lin H, Sinha R, Potenza MN. Body mass index correlates negatively  
754 with white matter integrity in the fornix and corpus callosum: A diffusion tensor  
755 imaging study. *Hum Brain Mapp*. 2013;34:1044–52.
- 756 14. Jochems ACC, Arteaga C, Chappell F, Ritakari T, Hooley M, Doubal F, et al.  
757 Longitudinal Changes of White Matter Hyperintensities in Sporadic Small Vessel  
758 Disease: A Systematic Review and Meta-analysis. *Neurology*. 2022;99:E2454–63.
- 759 15. Wardlaw JM, Valdés Hernández MC, Muñoz-Maniega S. What are white matter  
760 hyperintensities made of? Relevance to vascular cognitive impairment. *J Am Heart*  
761 *Assoc*. 2015;4:001140.
- 762 16. Behl C. Apoptosis and Alzheimer ’ s disease Review. *Journal of Neural*  
763 *Transmissio*. 2000;1325–44.

- 764 17. Nasrabad SE, Rizvi B, Goldman JE, Brickman AM. White matter changes in  
765 Alzheimer's disease: a focus on myelin and oligodendrocytes. *Acta Neuropathol*  
766 *Commun.* 2018;6:22.
- 767 18. Obulesu M, Lakshmi MJ. Apoptosis in Alzheimer's Disease: An Understanding of  
768 the Physiology, Pathology and Therapeutic Avenues. *Neurochem Res.*  
769 2014;39:2301–12.
- 770 19. Jouvent E, Mangin JF, Duchesnay E, Porcher R, Düring M, Mewald Y, et al.  
771 Longitudinal changes of cortical morphology in CADASIL. *Neurobiol Aging* [Internet].  
772 2012;33:1002.e29-1002.e36. Available from:  
773 <http://dx.doi.org/10.1016/j.neurobiolaging.2011.09.013>
- 774 20. Brown WR, Moody DM, Thore CR, Challa VR. Apoptosis in leukoaraiosis.  
775 *American Journal of Neuroradiology.* 2000;21:79–82.
- 776 21. Wen W, Sachdev PS, Chen X, Anstey K. Gray matter reduction is correlated with  
777 white matter hyperintensity volume: A voxel-based morphometric study in a large  
778 epidemiological sample. *Neuroimage.* 2006;29:1031–9.
- 779 22. Kim SE, Kim HJ, Jang H, Weiner MW, DeCarli C, Na DL, et al. Interaction  
780 between Alzheimer's Disease and Cerebral Small Vessel Disease: A Review  
781 Focused on Neuroimaging Markers. *Int J Mol Sci.* MDPI; 2022.
- 782 23. Dadar M, Manera AL, Ducharme S, Collins DL. White matter hyperintensities are  
783 associated with grey matter atrophy and cognitive decline in Alzheimer's disease and  
784 frontotemporal dementia. *Neurobiol Aging* [Internet]. 2022;111:54–63. Available  
785 from: <https://doi.org/10.1016/j.neurobiolaging.2021.11.007>

- 786 24. Rizvi B, Lao PJ, Chesebro AG, Dworkin JD, Amarante E, Beato JM, et al.  
787 Association of Regional White Matter Hyperintensities with Longitudinal Alzheimer-  
788 Like Pattern of Neurodegeneration in Older Adults. *JAMA Netw Open*. 2021;1–13.
- 789 25. Rizvi B, Sathishkumar M, Kim S, Márquez F, Granger SJ, Larson MS, et al.  
790 Posterior white matter hyperintensities are associated with reduced medial temporal  
791 lobe subregional integrity and long-term memory in older adults. *Neuroimage Clin*.  
792 2023;37.
- 793 26. Garnier-crussard A, Krolak-salmon P, Garnier-crussard A, Cotton F, Krolak-  
794 salmon P. White matter hyperintensities in Alzheimer ' s disease□: Beyond vascular  
795 contribution. *Alzheimers Dement*. 2023;
- 796 27. Dalby RB, Eskildsen SF, Videbech P, Frandsen J, Mouridsen K, Sørensen L, et  
797 al. Oxygenation differs among white matter hyperintensities, intersected fiber tracts  
798 and unaffected white matter. *Brain Commun*. 2019;1.
- 799 28. Ungvari Z, Toth P, Tarantini S, Prodan CI, Sorond F, Merkely B, et al.  
800 Hypertension-induced cognitive impairment: from pathophysiology to public health.  
801 *Nat Rev Nephrol*. 2021;17:639–54.
- 802 29. van Veluw SJ, Arfanakis K, Schneider JA. Neuropathology of Vascular Brain  
803 Health: Insights from Ex Vivo Magnetic Resonance Imaging-Histopathology Studies  
804 in Cerebral Small Vessel Disease. *Stroke*. 2022;53:404–15.
- 805 30. Mayer C, Frey BM, Schlemm E, Petersen M, Engelke K, Hanning U, et al.  
806 Linking cortical atrophy to white matter hyperintensities of presumed vascular origin.  
807 *Journal of Cerebral Blood Flow and Metabolism*. 2021;41:1682–91.

- 808 31. McAleese KE, Firbank M, Dey M, Colloby SJ, Walker L, Johnson M, et al.  
809 Cortical tau load is associated with white matter hyperintensities. *Acta Neuropathol*  
810 *Commun.* 2015;3:60.
- 811 32. McAleese KE, Walker L, Graham S, Moya ELJ, Johnson M, Erskine D, et al.  
812 Parietal white matter lesions in Alzheimer's disease are associated with cortical  
813 neurodegenerative pathology, but not with small vessel disease. *Acta Neuropathol.*  
814 2017;134:459–73.
- 815 33. Shirzadi Z, Schultz SA, Yau W-YW, Joseph-Mathurin N, Fitzpatrick CD, Levin R,  
816 et al. Etiology of White Matter Hyperintensities in Autosomal Dominant and Sporadic  
817 Alzheimer Disease. *JAMA Neurol* [Internet]. 2023; Available from:  
818 <https://jamanetwork.com/journals/jamaneurology/fullarticle/2810315>
- 819 34. Salvadores N, Gerónimo-Olvera C, Court FA. Axonal Degeneration in AD: The  
820 Contribution of A $\beta$  and Tau. *Front Aging Neurosci.* Frontiers Media S.A.; 2020.
- 821 35. Bernal J, Schreiber S, Menze I, Ostendorf A, Pfister M, Geisendörfer J, et al.  
822 Arterial hypertension and  $\beta$ -amyloid accumulation have spatially overlapping effects  
823 on posterior white matter hyperintensity volume: a cross-sectional study. *Alzheimers*  
824 *Res Ther.* 2023;15.
- 825 36. Alber J, Alladi S, Bae HJ, Barton DA, Beckett LA, Bell JM, et al. White matter  
826 hyperintensities in vascular contributions to cognitive impairment and dementia  
827 (VCID): Knowledge gaps and opportunities. *Alzheimer's and Dementia: Translational*  
828 *Research and Clinical Interventions.* 2019;5:107–17.
- 829 37. Garnier-Crussard A, Bougacha S, Wirth M, Dautricourt S, Sherif S, Landeau B,  
830 et al. White matter hyperintensity topography in Alzheimer's disease and links to  
831 cognition. *Alzheimer's and Dementia.* 2022;18:422–33.

- 832 38. Pålhaugen L, Sudre CH, Tecelao S, Nakling A, Almdahl IS, Kalheim LF, et al.  
833 Brain amyloid and vascular risk are related to distinct white matter hyperintensity  
834 patterns. *Journal of Cerebral Blood Flow and Metabolism*. 2021;41:1162–74.
- 835 39. Jessen F, Spottke A, Boecker H, Brosseron F, Buerger K, Catak C, et al. Design  
836 and first baseline data of the DZNE multicenter observational study on predementia  
837 Alzheimer’s disease (DELCODE). *Alzheimers Res Ther*. 2018;10:1–10.
- 838 40. Gaser C, Dahnke R, Kurth K, Luders E, Alzheimer’s Disease Neuroimaging  
839 Initiative. A computational Anatomy Toolbox for the Analysis of Structural MRI Data.  
840 *bioRxiv*. 2022;1–37.
- 841 41. Desikan RS, Ségonne F, Fischl B, Quinn BT, Dickerson BC, Blacker D, et al. An  
842 automated labeling system for subdividing the human cerebral cortex on MRI scans  
843 into gyral based regions of interest. *Neuroimage*. 2006;31:968–80.
- 844 42. Yushkevich PA, Pluta J, Wang H, Wisse LEM, Das S, Wolk D. IC-P-174: Fast  
845 Automatic Segmentation of Hippocampal Subfields and Medial Temporal Lobe  
846 Subregions In 3 Tesla and 7 Tesla T2-Weighted MRI. *Alzheimer’s & Dementia*.  
847 2016;12.
- 848 43. Isensee F, Schell M, Pflueger I, Brugnara G, Bonekamp D, Neuberger U, et al.  
849 Automated brain extraction of multisequence MRI using artificial neural networks.  
850 *Hum Brain Mapp*. 2019;40:4952–64.
- 851 44. Wiltgen T, McGinnis J, Schlaeger S, Kofler F, Voon CC, Berthele A, et al. LST-  
852 AI: A deep learning ensemble for accurate MS lesion segmentation. *Neuroimage*  
853 *Clin*. 2024;42.

- 854 45. Joshi AA, Choi S, Liu Y, Chong M, Sonkar G, Gonzalez-Martinez J, et al. A  
855 hybrid high-resolution anatomical MRI atlas with sub-parcellation of cortical gyri  
856 using resting fMRI. *J Neurosci Methods*. 2022;374.
- 857 46. Larivière S, Paquola C, Park B yong, Royer J, Wang Y, Benkarim O, et al. The  
858 ENIGMA Toolbox: multiscale neural contextualization of multisite neuroimaging  
859 datasets. *Nat Methods. Nature Research*; 2021. p. 698–700.
- 860 47. McArdle JJ, Nesselroade JohnR. Using multivariate data to structure  
861 developmental change." *Life-span developmental psychology: Methodological*  
862 *contributions*. In: Cohen SH, Reese HW, editors. *Life-Span Developmental*  
863 *Psychology: Methodological Contributions*. 1st ed. New York: Psychology Press;  
864 1994. p. 223–67.
- 865 48. Muniz-Terrera G, Robitaille A, Kelly A, Johansson B, Hofer S, Piccinin A. Latent  
866 growth models matched to research questions to answer questions about dynamics  
867 of change in multiple processes. *J Clin Epidemiol*. 2017;82:158–66.
- 868 49. Tukey JW. *Exploratory data analysis*. Addison-Wesley Pub. Co.; 1977.
- 869 50. Hu LT, Bentler PM. Cutoff criteria for fit indexes in covariance structure analysis:  
870 Conventional criteria versus new alternatives. *Structural Equation Modeling*.  
871 1999;6:1–55.
- 872 51. Benjamini Y, Hochberg Y. Controlling the false discovery rate: a practical and  
873 powerful approach to multiple testing. *Journal of the royal statistical society Series B*  
874 (Methodological). 1995;289–300.

- 875 52. Van Leijsen EMC, Van Uden IWM, Ghafoorian M, Bergkamp MI, Lohner V,  
876 Kooijmans ECM, et al. Nonlinear temporal dynamics of cerebral small vessel  
877 disease. *Neurology*. 2017;89:1569–77.
- 878 53. Keuss SE, Coath W, Nicholas JM, Poole T, Barnes J, Cash DM, et al.  
879 Associations of  $\beta$ -Amyloid and Vascular Burden with Rates of Neurodegeneration in  
880 Cognitively Normal Members of the 1946 British Birth Cohort. *Neurology*.  
881 2022;99:E129–41.
- 882 54. Cai M, Jacob MA, Van Loenen MR, Bergkamp M, Marques J, Norris DG, et al.  
883 Determinants and Temporal Dynamics of Cerebral Small Vessel Disease: 14-Year  
884 Follow-Up. *Stroke*. 2022;53:2789–98.
- 885 55. Wardlaw JM, Smith C, Dichgans M. Small vessel disease: mechanisms and  
886 clinical implications. *Lancet Neurol*. 2019;18:684–96.
- 887 56. Lohner V, Pehlivan G, Sanroma G, Miloschewski A, Schirmer MD, Stöcker T, et  
888 al. Relation Between Sex, Menopause, and White Matter Hyperintensities: The  
889 Rhineland Study. *Neurology*. 2022;99:E935–43.
- 890 57. Brown RB, Tozer DJ, Egle M, Tuladhar AM, de Leeuw FE, Markus HS. How  
891 often does white matter hyperintensity volume regress in cerebral small vessel  
892 disease? *International Journal of Stroke*. 2023;00.
- 893 58. Salat DH, Buckner RL, Snyder AZ, Greve DN, Desikan RSR, Busa E, et al.  
894 Thinning of the Cerebral Cortex in Aging. *Cerebral Cortex* [Internet]. 2004;14:721–  
895 30. Available from: <https://doi.org/10.1093/cercor/bhh032>
- 896 59. Cardin V. Effects of aging and adult-onset hearing loss on cortical auditory  
897 regions. *Front Neurosci*. Frontiers Media S.A.; 2016.

- 898 60. Li KZH, Lindenberger U. Relations between aging sensory/sensorimotor and  
899 cognitive functions. *Neurosci Biobehav Rev* [Internet]. 2002;26:777–83. Available  
900 from: [www.elsevier.com/locate/neubiorev](http://www.elsevier.com/locate/neubiorev)
- 901 61. Schneider BA, Pichora-Fuller MK. Implications of perceptual deterioration for  
902 cognitive aging research. *The handbook of aging and cognition*, 2nd ed. Mahwah,  
903 NJ, US: Lawrence Erlbaum Associates Publishers; 2000. p. 155–219.
- 904 62. Mann SL, Hazlett EA, Byne W, Hof PR, Buchsbaum MS, Cohen BH, et al.  
905 Anterior and posterior cingulate cortex volume in healthy adults: Effects of aging and  
906 gender differences. *Brain Res*. 2011;1401:18–29.
- 907 63. Shackman AJ, Salomons T V., Slagter HA, Fox AS, Winter JJ, Davidson RJ. The  
908 integration of negative affect, pain and cognitive control in the cingulate cortex. *Nat*  
909 *Rev Neurosci*. 2011. p. 154–67.
- 910 64. Schwarck S, Voelkle MC, Becke A, Busse N, Glanz W, Ziegler G. Interplay of  
911 physical and cognitive performance using hierarchical continuous-time dynamic  
912 modelling and a 2 dual-task training regime in Alzheimer’s patients. Available from:  
913 <https://doi.org/10.1101/2022.12.14.22283428>
- 914 65. Duering M, Righart R, Wollenweber FA, Zietemann V, Gesierich B, Dichgans M.  
915 Acute infarcts cause focal thinning in remote cortex via degeneration of connecting  
916 fiber tracts. *Neurology*. 2015;84:1685–92.
- 917 66. Duering M, Righart R, Csanadi E, Jouvent E, Herve D, Chabriat H, et al. Incident  
918 subcortical infarcts induce focal thinning in connected cortical regions. *Neurology*.  
919 2012;79:2025–8.



- 920 67. Li H, Jacob MA, Cai M, Duering M, Chamberland M, Norris DG, et al. Regional  
921 cortical thinning, demyelination, and iron loss in cerebral small vessel disease. *Brain*.  
922 2023;
- 923 68. Jiaerken Y, Luo X, Yu X, Huang P, Xu X, Zhang M. Microstructural and metabolic  
924 changes in the longitudinal progression of white matter hyperintensities. *Journal of*  
925 *Cerebral Blood Flow and Metabolism*. 2019;39:1613–22.
- 926 69. Reginold W, Sam K, Poublanc J, Fisher J, Crawley A, Mikulis DJ. Impact of white  
927 matter hyperintensities on surrounding white matter tracts. *Neuroradiology*.  
928 2018;60:933–44.
- 929 70. Wardlaw JM, Makin SJ, Valdés Hernández MC, Armitage PA, Heye AK,  
930 Chappell FM, et al. Blood-brain barrier failure as a core mechanism in cerebral small  
931 vessel disease and dementia: evidence from a cohort study. *Alzheimer's and*  
932 *Dementia*. 2017;13:634–43.
- 933 71. Cabeza R, Albert M, Belleville S, Craik FIM, Duarte A, Grady CL, et al.  
934 Maintenance, reserve and compensation: the cognitive neuroscience of healthy  
935 ageing. *Nat Rev Neurosci*. Nature Publishing Group; 2018. p. 701–10.
- 936 72. Li J, Siegrist J. Physical activity and risk of cardiovascular disease-a meta-  
937 analysis of prospective cohort studies. *Int J Environ Res Public Health*. MDPI; 2012.  
938 p. 391–407.
- 939 73. Benarroch EE. Insular cortex: Functional complexity and clinical correlations.  
940 *Neurology*. 2019;93:932–8.
- 941 74. Gogolla N. The insular cortex. *Current Biology*. Cell Press; 2017. p. R580–6.

- 942 75. Duering M, Biessels GJ, Brodtmann A, Chen C, Cordonnier C, de Leeuw F-E, et  
943 al. Neuroimaging standards for research into small vessel disease—advances since  
944 2013. *Lancet Neurol* [Internet]. 2023;22:602–18. Available from:  
945 <https://linkinghub.elsevier.com/retrieve/pii/S147444222300131X>
- 946 76. Desmarais P, Gao AF, Lanctôt K, Rogaeva E, Ramirez J, Herrmann N, et al.  
947 White matter hyperintensities in autopsy-confirmed frontotemporal lobar  
948 degeneration and Alzheimer’s disease. *Alzheimers Res Ther*. 2021;13:1–16.
- 949 77. Kitamura J, Nagai M, Ueno H, Ohshita T, Kikumoto M, Toko M, et al. The Insular  
950 Cortex, Alzheimer Disease Pathology, and Their Effects on Blood Pressure  
951 Variability [Internet]. 2020. Available from: [www.alzheimerjournal.com](http://www.alzheimerjournal.com)
- 952 78. Zhang J, Chen H, Wang J, Huang Q, Xu X, Wang W, et al. Linking white matter  
953 hyperintensities to regional cortical thinning, amyloid deposition, and synaptic density  
954 loss in Alzheimer’s disease. *Alzheimer’s & Dementia* [Internet]. 2024; Available from:  
955 <https://alz-journals.onlinelibrary.wiley.com/doi/10.1002/alz.13845>
- 956 79. Hotz I, Deschwanden PF, Mérillat S, Jäncke L. Associations between white  
957 matter hyperintensities, lacunes, entorhinal cortex thickness, declarative memory  
958 and leisure activity in cognitively healthy older adults: A 7-year study. *Neuroimage*.  
959 2023;284.
- 960 80. Bussas M, Grahl S, Pongratz V, Berthele A, Gasperi C, Andlauer T, et al. Gray  
961 matter atrophy in relapsing-remitting multiple sclerosis is associated with white  
962 matter lesions in connecting fibers. *Multiple Sclerosis Journal*. 2022;28:900–9.
- 963 81. Sailer M, Fischl B, Salat D, Tempelmann C, Schönfeld MA, Busa E, et al. Focal  
964 thinning of the cerebral cortex in multiple sclerosis. *Brain*. 2003;126:1734–44.

- 965 82. Kim SJ, Lee DK, Jang YK, Jang H, Kim SE, Cho SH, et al. The effects of  
966 longitudinal white matter hyperintensity change on cognitive decline and cortical  
967 thinning over three years. *J Clin Med*. 2020;9:1–13.
- 968 83. Kievit RA, Brandmaier AM, Ziegler G, van Harmelen AL, de Mooij SMM,  
969 Moutoussis M, et al. Developmental cognitive neuroscience using latent change  
970 score models: A tutorial and applications. *Dev Cogn Neurosci [Internet]*. 2018;33:99–  
971 117. Available from: <https://doi.org/10.1016/j.dcn.2017.11.007>
- 972 84. Wang L, Lyu X, Zhang Z, Li L. High-dimensional Response Growth Curve  
973 Modeling for Longitudinal Neuroimaging Analysis. *ArXiv [Internet]*. 2023;1–30.  
974 Available from: <http://arxiv.org/abs/2305.15751>
- 975 85. Reginold W, Itorralba J, Luedke AC, Fernandez-Ruiz J, Reginold J, Islam O, et  
976 al. Tractography at 3T MRI of corpus callosum tracts crossing white matter  
977 hyperintensities. *American Journal of Neuroradiology*. 2016;37:1617–22.
- 978 86. Soch J, Richter A, Kizilirmak JM, Schütze H, Feldhoff H, Fischer L, et al.  
979 Structural and Functional MRI Data Differentially Predict Chronological Age and  
980 Behavioral Memory Performance. *eNeuro*. 2022;9.
- 981

## 982 **Figure legends**

983 **Figure 1. BLGCM to probe the coupling of cortical thickness and WMH over repeated**  
984 **measures.**

985 Illustration of the longitudinal structural equation modeling (SEM) model used on global regional/lobar  
986 level. We employed the conventional notation with squared variables indicating observed and  
987 measured variables (manifest variables) and circular ones referring to latent (unobserved) variables.  
988 Single-headed solid arrows illustrate a modelled relationship between two variables, with the arrow  
989 pointing towards the dependent variable. Single-headed dashed arrows signify a relationship between  
990 two variables, where the weight is fixed. Double-headed arrows represent the covariance  
991 (hyperparameter) between two variables. Grey triangles represent latent intercept estimates. We

992 further adjusted latent intercepts and slopes for age, sex, years of education, total cardiovascular risk  
993 factors, and TICV. We omitted these paths for visualisation purposes.

994

## 995 **Figure 2. Changes in WMH volumes and cortical thickness over four years.**

996 We obtained latent intercepts and slopes for each individual through the application of univariate  
997 LGCM to WMH volumes and cortical thickness (separate models for each neuroimaging feature). We  
998 used them to compute latent growth curve parameters and predict individual trajectories, corrected for  
999 age, sex, years of education, total cardiovascular risk scores, and TICV. Prior to plotting and to  
1000 enhance interpretability, we back-transformed all predicted measurements. (A) Total WMH volume  
1001 trajectories, as predicted by the model. Blue lines represent the predicted trajectories and the pink  
1002 one the average one. (B) Back-transformed individual factor scores of latent slopes for WMH  
1003 ( $\Delta_{\text{WMH}}^{\text{Regional}}$ ), summarised in the density plots, indicate that WMH volumes generally increased over time.  
1004 We adjusted density plots such that the modes attain the highest value, irrespective of the actual  
1005 frequency. The rate of change varied substantially across individuals in both cases. WMH  
1006 progression, from fastest to slowest, occurred in the frontal, parietal, occipital, and temporal lobes  
1007 (approximated average rates of change: 0.180 [95%-CI 0.153, 0.207], 0.175 [95%-CI 0.137, 0.212],  
1008 0.034 [95%-CI 0.027, 0.042], 0.018 [IQR 0.015, 0.022] ml / year, respectively). Interestingly, while  
1009 progression was predominant, a few subjects showed a clear and consistent decrease in global WMH  
1010 volumes over the course of the study, especially across the occipital lobes. Visual assessment  
1011 revealed that enlargement of lateral ventricles contributed to such volumetric loss. (C) Annual change  
1012 in parietal and occipital WMH in relation to education and sex, respectively. (D) Regions exhibiting  
1013 substantial cortical thinning over the course of the study. Both the cingulate and lateral temporal  
1014 cortex underwent the most thinning (intercept of  $\Delta_{\text{Thick}}^{\text{Global}}$  peaked in the caudal anterior cingulate cortex  
1015 = -0.875,  $SE = 0.107$ ,  $Z = -8.196$ ,  $p$ -value < 0.001). (E) Back-transformed individual factor scores of  
1016 cortical thicknesses ( $\Delta_{\text{Thick}}^{\text{Regional}}$ ) across regions experiencing the most pronounced thinning over time.  
1017 Caudal anterior and posterior cingulate cortices underwent the most decline over the course of four  
1018 years, with an average decrease in thickness of -0.014 [IQR -0.016, -0.013] and -0.011 [95%-CI -  
1019 0.012, -0.009] mm/year, respectively. The variability in change rates indicated significant inter-  
1020 individual differences in regional cortical thinning. (F) Annual change in thickness across the isthmus  
1021 cingulate and parahippocampal cortex in relation to age.

1022

## 1023 **Figure 3. Spatiotemporal coupling between cortical thickness and WMH.**

1024 We employed longitudinal BLGCMs to characterise the spatiotemporal interrelation between lobar  
1025 WMH and regional cortical thickness over the span of four years—one model for each pair. We  
1026 adjusted latent intercepts and slopes for age, sex, years of education, total cardiovascular risk scores,  
1027 and TICV. We applied FDR correction to account for multiple comparisons. In regions highlighted in  
1028 red, we found a statistically significant covariance between latent growth curve parameters after FDR  
1029 correction ( $p_{\text{FDR}} < 0.05$ ). (A; *intercept – intercept covariance*). Individuals with larger baseline WMH  
1030 volumes had lower mean cortical thicknesses over the entire brain. (B; *WMH intercept – thickness*  
1031 *slope covariance*) Individuals who underwent a steeper decrease in the thickness of their cingulate  
1032 cortices had larger WMH volumes across the frontal, parietal, and occipital lobes. (C; *thickness*  
1033 *intercept – WMH slope covariance*). Individuals with thicker cingulate cortices at baseline, particularly  
1034 at the level of the isthmus, experienced a slower progression in parietal WMH volumes compared to  
1035 those with thinner cortices. Also, those with initially thicker precentral, insular, and rostral anterior  
1036 cingulate cortices had a slower progression in occipital WMH volumes. (D; *slope – slope covariance*)  
1037 Slope-slope covariances did not survive FDR correction. However, a rapid increase in frontal, parietal,  
1038 and temporal WMH volumes was, in general, associated with accelerated cortical thinning across  
1039 multiple brain regions (Figure S1). Associations with temporal WMH volumes did not survive FDR  
1040 correction and, thus, we excluded them from the plot. The uncorrected version of the figure is  
1041 available in Supplementary Material.

1042

## 1043 **Figure 4. Peak intercept-slope and slope-slope associations.**

1044 (A) Average trajectories of cortical thickness and WMH trajectories over the course of four years,  
1045 stratified by latent WMH and cortical thickness intercepts, respectively. We plotted here the four  
1046 strongest intercept-slope associations, according to Figure 3B and C. We categorised individuals  
1047 based on whether their latent intercepts were below the 33rd or above the 66th percentile,

1048 respectively. We then estimated the average trajectories for each of these groups. We back-  
1049 transformed all predicted measurements to plotting for interpretability purposes. Solid and dashed  
1050 lines depict the predicted average trajectories for these groups. Shadowed areas represent  
1051 confidence intervals. (A.1) On average, the reduction in anterior cingulate cortex thickness among  
1052 individuals with high frontal WMH volumes would be twice as large as among those with low WMH  
1053 volumes (0.069 mm vs 0.029 mm in four years). Likewise, the decrease in thickness across the  
1054 superior temporal cortices among individuals with high frontal WMH volumes would be approximately  
1055 1.5 times greater than that observed in those with low WMH volumes (0.021 mm vs 0.013 mm over  
1056 four years). (A.2) On average, parietal WMH volume increases among individuals with thick isthmus  
1057 cingulate cortices would be half as large as that observed in those with thin ones (0.146 ml vs 0.294  
1058 ml over four years). Similarly, occipital WMH volume increases across the among individuals with thin  
1059 anterior cingulate cortex would be approximately four times greater than those observed in those with  
1060 thick ones (0.108 ml vs 0.026 ml in four years). (B) Individuals with faster frontal WMH progression  
1061 tended to have faster cortical thinning over time, especially in the caudal middle frontal, paracentral,  
1062 posterior cingulate, and superior frontal cortex.

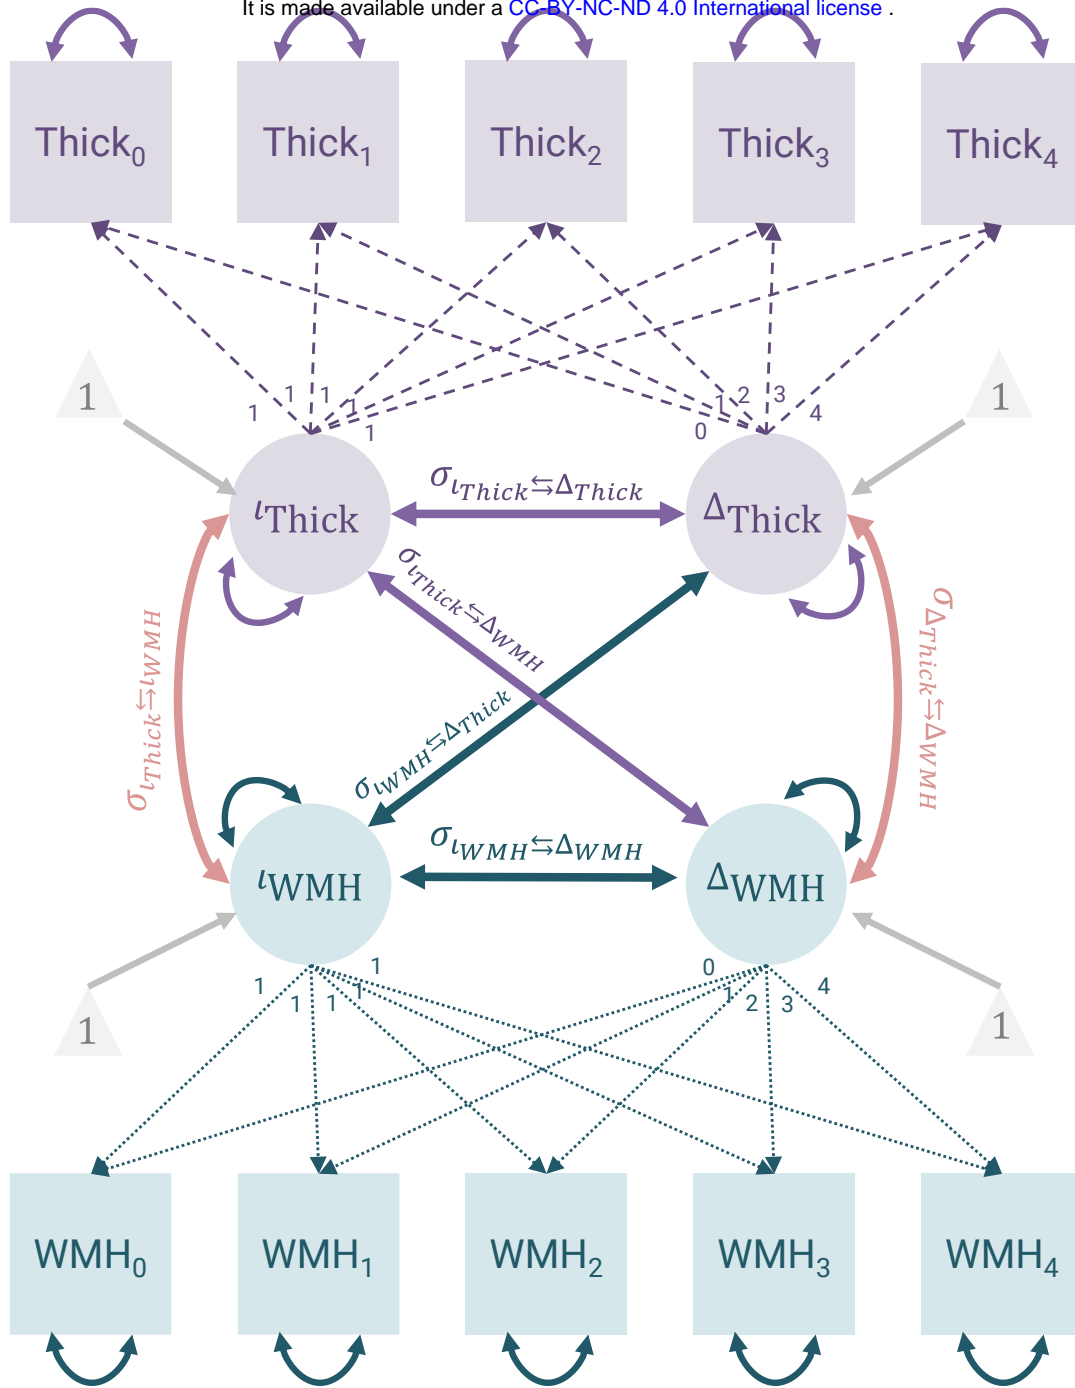

1  
2 **Figure 1.**

## Changes in WMH volumes and cortical thickness over the course of four years

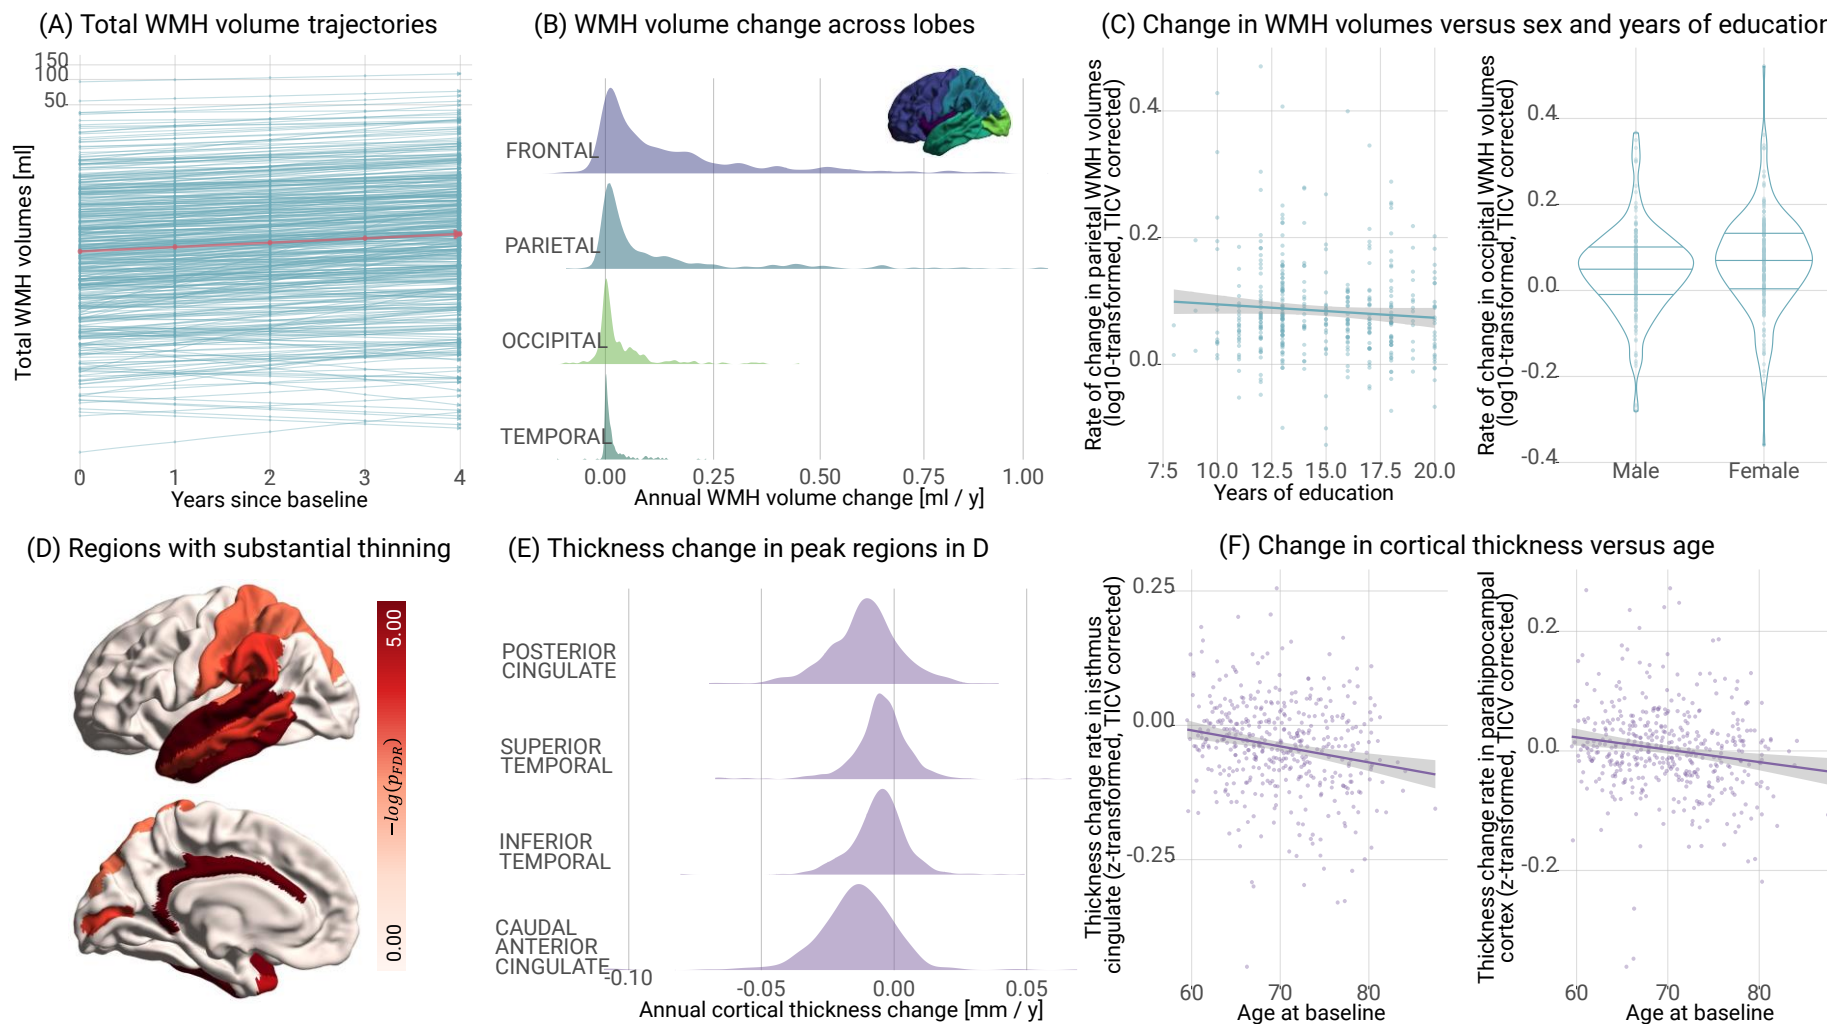

4

5 **Figure 2.**

### Association between growth parameters of WMH and cortical thickness\*

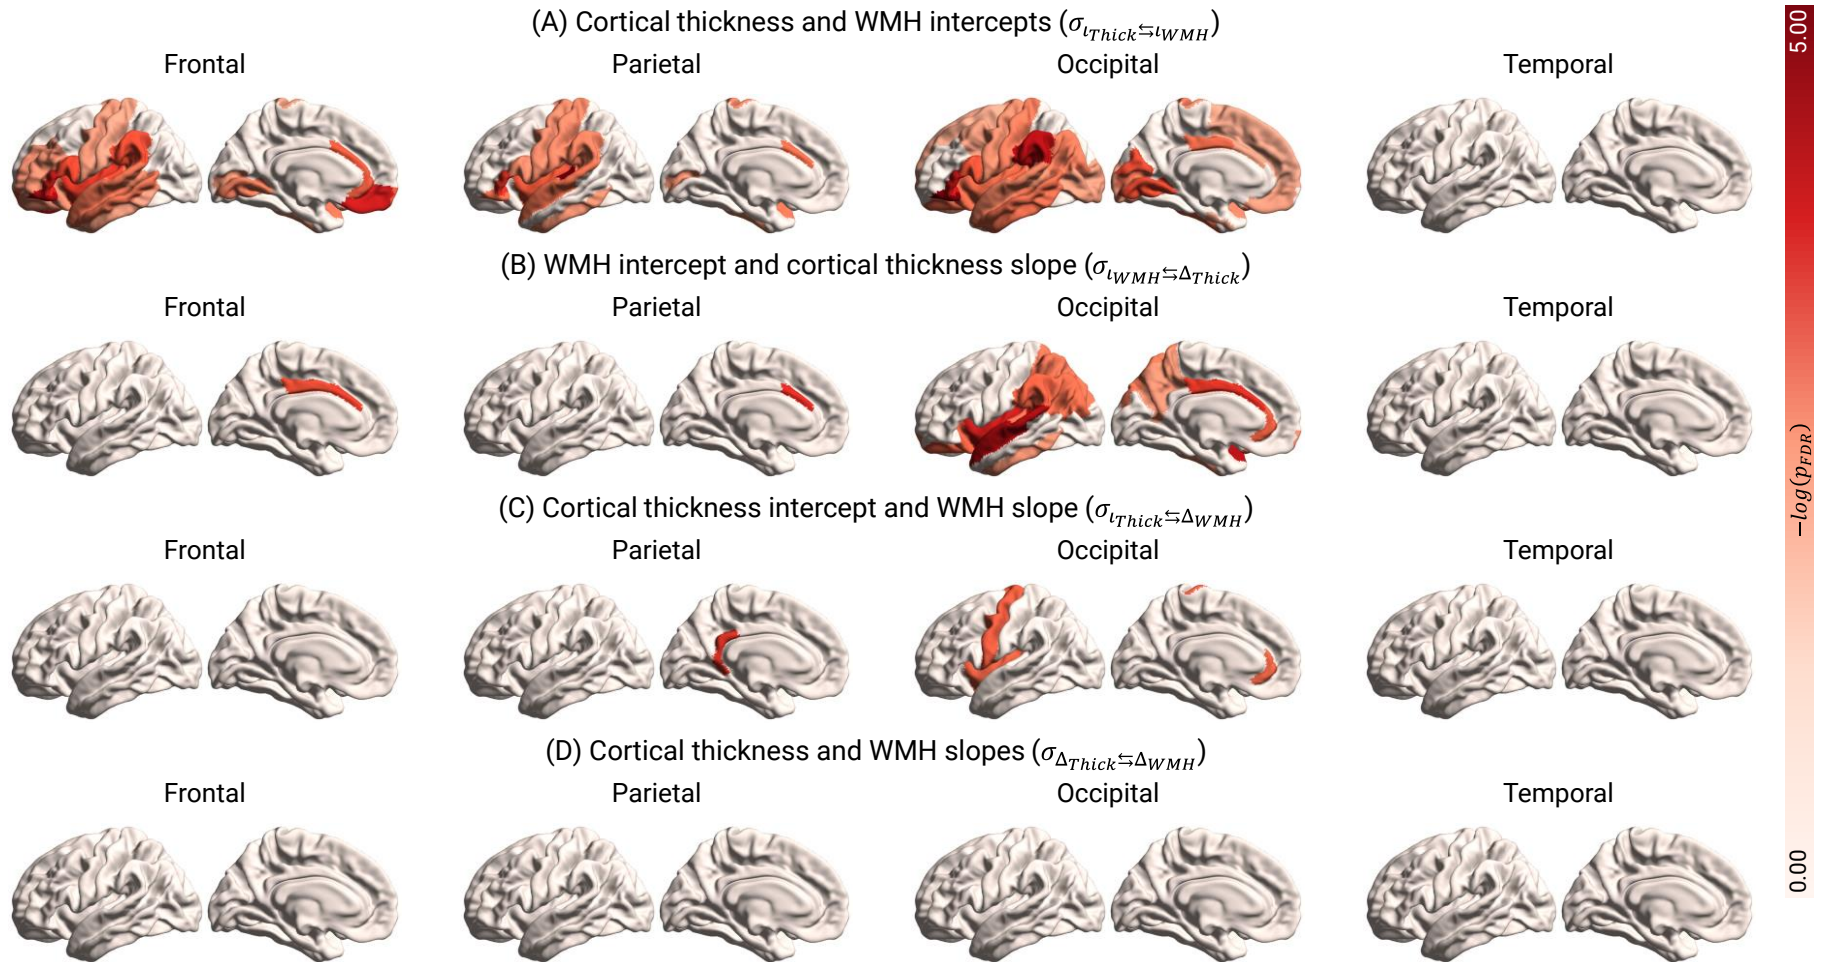

\* Latent growth parameters were adjusted for age, sex, years of education, total cardiovascular risk factor, and total intracranial volume

7

8 **Figure 3.**



**(A) Peak intercept-slope associations**

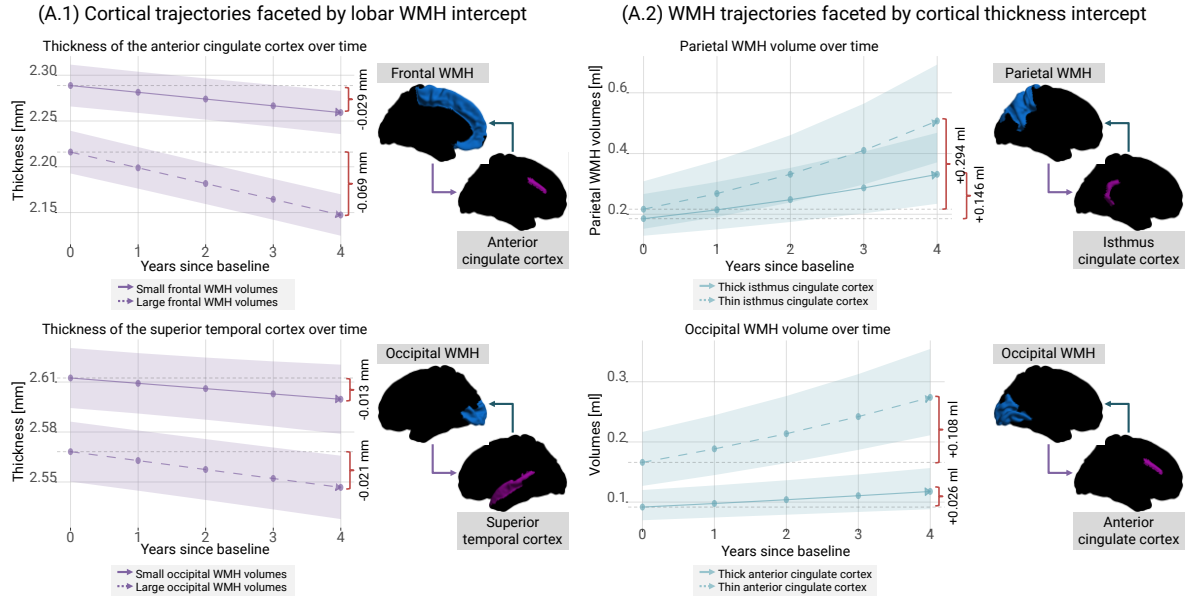

**(B) Peak slope-slope associations**

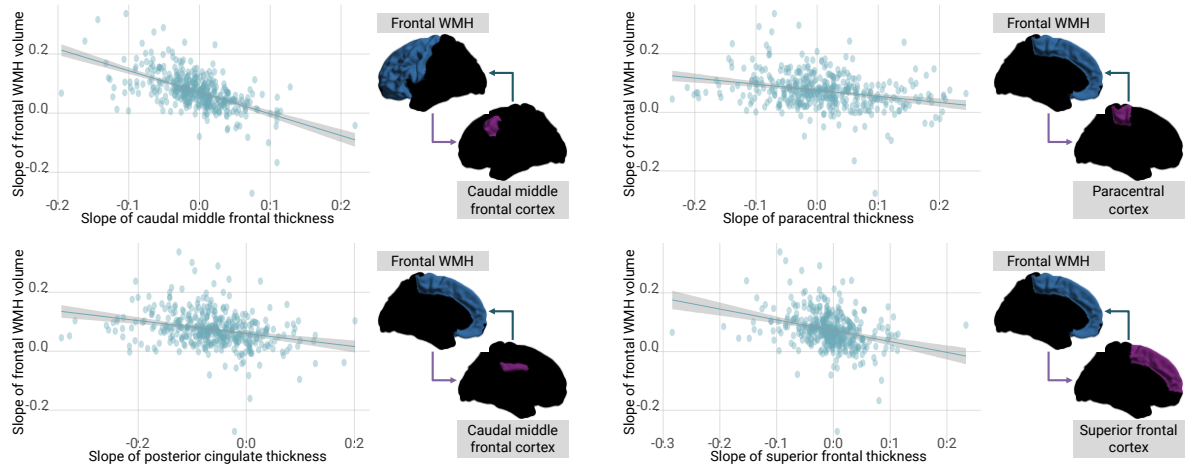

9  
10 **Figure 4.**
